# Supplementary material for: Enhanced Translocation and Growth of Rhodococcus erythropolis PR4 in the Alkane Phase of Aqueous-Alkane Two Phase Cultures Were Mediated by GroEL2 Overexpression
Source: PubMed Central journal article supplement (PMC4262357; doi:10.1264/jsme2.me13158), 2014-10-11

## Supplemental materials

Enhanced Translocation and Growth of *Rhodococcus erythropolis* PR4 in  
the Alkane Phase of Aqueous-Alkane Two Phase Cultures Were Mediated  
5 by GroEL2 Overexpression.

Hayato Takihara<sup>1</sup>, Jun Ogihara<sup>2</sup>, Takao Yoshida<sup>3</sup>, Shujiro Okuda<sup>4</sup>, Mutsuyasu Nakajima<sup>1</sup>,  
Noriyuki Iwabuchi<sup>1\*</sup>, Michio Sunairi<sup>1</sup>.

10 <sup>1</sup>Laboratory of Molecular Microbiology, Department of Applied Biological Science,  
College of Bioresource Sciences, Nihon University, 1866 Kameino, Fujisawa,  
Kanagawa 252-8510, Japan; <sup>2</sup>Laboratory of Enzyme Chemistry, Department of  
Chemistry and Life Science, College of Bioresource Sciences, Nihon University, 1866  
Kameino, Fujisawa, Kanagawa 252-8510, Japan; <sup>3</sup>Marine Biodiversity Research  
15 Program, Institute of Biogeosciences, Japan Agency for Marine-Earth Science and  
Technology (JAMSTEC), 2-15 Natsushima-cho, Yokosuka, Kanagawa 237-0061,  
Japan; and <sup>4</sup>Niigata University Graduate School of Medical and Dental Sciences, 1-757  
Asahimachi-dori, Chuo-ku, Niigata 951-8510, JAPAN

## Supplemental materials and methods

### *Protein extraction and SDS-PAGE*

Total cells were collected from the cultures by centrifugation or filtration using a hydrophobic filter (PTFE membrane filter, 0.5  $\mu\text{m}$ , Advantec, Tokyo, Japan), and the collected cells were washed twice with MilliQ water, and resuspended in MilliQ water adjusted to final concentrations of  $1 \times 10^7$  CFU  $\text{mL}^{-1}$ . The cell suspensions were centrifuged and resuspended in 100  $\mu\text{L}$  of SDS-PAGE sample buffer (62.5 mM Tris, 4% SDS, 25% glycerol, 0.002% bromophenol blue, and 5%  $\beta$ -mercaptoethanol, pH 6.8). To obtain protein samples, the cell suspension in SDS-PAGE sample buffer were applied to sonication. When required, cell suspensions were placed in a 95°C water bath for 20 min with intermittent vortexing. The sonication and water bath steps were repeated until a liquid color becomes transparent. The resulting lysate was centrifuged at 12,000 rpm at 25°C for 15 min to pellet the cell debris. The membrane-containing supernatant was then collected and the protein concentration was determined by using a Bio-Rad Protein Assay kit (Bio-Rad, Tokyo, Japan), with bovine serum albumin as a standard. Protein isolation efficiency in each sample was checked before SDS-PAGE.

A total of 10  $\mu\text{g}$  of the membrane-containing supernatant was loaded onto a 15% precast polyacrylamide gel (6.5  $\times$  9.5 mm, Bio-Rad, Tokyo, Japan), which was run at 60 V for 4 h. Following electrophoresis, the gel was stained using an MS-compatible silver stain, as described previously (28). For downstream proteomic analysis, a single lane from the silver-stained gel was divided equally into 10 slices of 6-mm width each. Each gel slice was then cut into smaller pieces and placed into a 1.5-mL tube. The gel pieces were destained by rinsing in destaining solution (15 mM  $\text{K}_3[\text{Fe}(\text{CN})_6]$ , 50 mM  $\text{Na}_2\text{S}_2\text{O}_3$ ). Disulfide bonds were reduced by incubating samples at 56°C for 1 h in 10 mM dithiothreitol in 25 mM  $\text{NH}_4\text{HCO}_3$ . Proteins within the gel pieces were alkylated by incubation in 55 mM iodoacetamide in 25

mM  $\text{NH}_4\text{HCO}_3$  for 45 min in the dark at room temperature. Gel pieces were then washed with 50% acetonitrile and dried in a vacuum concentrator (CVE200D, Tokyorikakikai, Tokyo, Japan). Next, 30  $\mu\text{L}$  of trypsin solution ( $10 \mu\text{g mL}^{-1}$  in 50 mM  $\text{NH}_4\text{HCO}_3$ ) prepared from modified sequencing grade trypsin (Promega, Fitchburg, WI, USA) was added to the gel  
5 pieces, and the samples were placed at  $4^\circ\text{C}$  for 30 min, then incubated overnight at  $37^\circ\text{C}$  (in-gel digestion). The resulting peptides were extracted with 50% acetonitrile containing 5% trifluoroacetic acid, and the extracted peptide mixtures were stored at  $-20^\circ\text{C}$  until just prior to mass spectrometric analysis.

### *Mass spectrometry*

10 Liquid chromatography-tandem mass spectrometry (LC-MS/MS) analysis of tryptic peptides was carried out using an LCQ Deca XP ion trap mass spectrometer (ThermoFinnigan, Waltham, MA, USA) equipped with a nano-LC electrospray ionization source (AMR, Tokyo, Japan), interfaced on-line with a capillary HPLC system (Paradigm MS4, Michrom Bioresources, Auburn, CA, USA). Prior to LC-MS/MS, samples were dried in a vacuum  
15 concentrator, redissolved in 0.1% (v/v) formic acid, and then introduced onto the analytical column using an autosampler (HTC-PAL system, CTC Analytics AG, Zwingen, Switzerland). An aliquot of peptide extract ( $10 \mu\text{L}$ ) was first transferred onto a C8 cartridge (Peptide Captrap, Michrom Bioresources) and the peptides eluting from the cartridge were transferred onto the analytical column (L-column 2 Micro C18,  $0.2 \text{ mm} \times 50 \text{ mm}$ , CERI, Tokyo, Japan)  
20 by means of a switching valve. Following an initial wash with mobile phase solvent A (2% [v/v] acetonitrile, 0.1% formic acid), peptides were eluted from the analytical column using a linear gradient from 5-80% mobile phase solvent B (90% [v/v] acetonitrile, 0.1% formic acid) over a 30 min interval. The eluate was transferred directly into the electrospray ionization source of the LCQ-Deca XP ion trap mass spectrometer. Automated peak recognition,

dynamic exclusion, and daughter ion scanning of the 2 most intense ions were controlled by Xcalibur software (2, 9). Spectra were scanned over the  $m/z$  range 450-2,000.

#### *Database searching and data interpretation*

Database searching and data interpretation of total peptides derived from 10 slices of the silver-stained gel were performed using BioWorks 3.3 (ThermoFinnigan). All MS/MS data were analyzed using SEQUEST, a computer program that allows for correlation of experimental data with theoretical spectra generated from known protein sequences (6, 34). The criteria we used for a preliminary positive peptide identification for a doubly charged peptide were a correlation factor (Xcorr) greater than 2.5, a delta cross-correlation factor (dCn) greater than 0.1 (indicating a significant difference between the best and the next best matches reported), a high preliminary score, and a minimum of one tryptic peptide terminus. For triply charged peptides, the correlation factor threshold was set at 3.5. All peptide matches were confirmed by visual examination of the spectra, and all spectra were searched against the *R. erythropolis* PR4 genome database and/or the latest version of the NCBI public nonredundant protein database.

The % relative abundance of each identified protein by calculating the peak area of the expressed protein was obtained by the Protein Area/Height Calculation for TurboSEQUEST and MultiConsensus. Semi-quantitative information of the expressed proteins was displayed in the % total ion current (TIC) values for the peptides in the MultiConsensus Results reports. Percent TIC is the % of total ion current matched (total ion current of matched peak/total ion current of all peaks). The TIC values represent the total ion current matched for the peptide.

#### *Data normalization*

Table 1, data of shotgun proteomic analysis was normalized as follows. The conserved hypothetical protein RER\_09740 was chosen as an IS for subsequent analyses because this protein was always identified under all testing conditions and in both the presence and

absence of alkane, with a relative abundance consistently greater than 1.0% in the experiments. Data regarding the relative abundance of all proteins identified in this study were adjusted based upon the abundance of RER\_09740 as an IS.

#### *Functional class assignment*

5 KEGG Orthology (KO) including functional categories based on ortholog groups and *R. erythropolis* PR4 genome were downloaded from KEGG (15). Functional classes and the corresponding KO identifiers were extracted. Based on the KO IDs in *R. erythropolis* PR4 genome annotated by KEGG, the functional classes were assigned to each gene. The expressed proteins were categorized and listed by KO IDs.

#### 10 *Antibodies and western blotting*

A GroEL2-specific rabbit polyclonal antibody was raised against synthetic peptides corresponding to the C-terminus (PAGDPTGGMGGMDF) of PR4 GroEL2. The peptide was conjugated to keyhole limpet hemocyanin prior to injection into rabbits. Samples containing approximately 1  $\mu\text{g}$  of protein were loaded onto a 13% polyacrylamide gel for SDS-PAGE  
15 analysis. The electrophoresed proteins were transferred onto a polyvinylidene difluoride (PVDF) membrane using a semi-dry blotter (Nippon Eido, Tokyo, Japan). After blocking nonspecific protein binding using Block Ace (Dainippon Pharmaceutical, Osaka, Japan), the membrane was incubated in phosphate-buffered saline containing rabbit serum followed by alkaline phosphatase-conjugated goat anti-rabbit immunoglobulin G (Invitrogen, Carisbad,  
20 CA, USA). The bound antibodies were detected by incubating the membrane in a solution of 0.4  $\text{mg mL}^{-1}$  nitro blue tetrazolium chloride and 0.19  $\text{mg mL}^{-1}$  5-bromo-4-chloro-3-indolyl phosphate in 100 mM Tris-HCl buffer (pH 9.5) containing 50 mM  $\text{MgSO}_4$ .

## Supplemental Table

**Table S1.** Total protein profile.

| Subclass                    | Pathway no. and sub-subclass                      | ID                                           | Annotation                                                                  | None | C12  | C19  |
|-----------------------------|---------------------------------------------------|----------------------------------------------|-----------------------------------------------------------------------------|------|------|------|
| Carbohydrate metabolism     | 00020 Citrate cycle (TCA cycle)                   | RER_30680                                    | aconitase, aconitate hydratase (acn)                                        | 0.38 | 0.35 | 2.61 |
|                             | 00630 Glyoxylate and dicarboxylate metabolism     | RER_30680                                    | aconitase, aconitate hydratase (acn)                                        | 0.38 | 0.35 | 2.61 |
|                             | 00010 Glycolysis / Gluconeogenesis                | RER_30290                                    | glyceraldehyde-3-phosphate dehydrogenase (gap)                              | 2.22 | 1.42 | 2.25 |
|                             | 00020 Citrate cycle (TCA cycle)                   | RER_36170                                    | dihydrolipoamide acyltransferase                                            | 1.13 | 0.31 | 1.63 |
|                             | 00640 Propanoate metabolism                       | RER_39550                                    | methylmalonate-semialdehyde dehydrogenase (mmsA)                            | 0.56 | -    | 1.04 |
|                             | 00562 Inositol phosphate metabolism               | RER_39550                                    | methylmalonate-semialdehyde dehydrogenase (mmsA)                            | 0.56 | -    | 1.04 |
|                             | 00020 Citrate cycle (TCA cycle)                   | RER_20050                                    | NADP-dependent isocitrate dehydrogenase (icd)                               | 0.13 | 0.8  | 0.56 |
|                             | 00010 Glycolysis / Gluconeogenesis                | RER_42830                                    | enolase, phosphopyruvate hydratase (eno)                                    | 0.3  | 0.08 | 0.42 |
|                             | 00640 Propanoate metabolism                       | RER_45700                                    | propionate--CoA ligase (prpE)                                               | -    | -    | 0.38 |
|                             | 00650 Butanoate metabolism                        | RER_23980                                    | acetolactate synthase small subunit, acetohydroxyacid synthase (ilvN)       | 0.13 | 0.22 | 0.35 |
|                             | 00660 C5-Branched dibasic acid metabolism         | RER_23980                                    | acetolactate synthase small subunit, acetohydroxyacid synthase (ilvN)       | 0.13 | 0.22 | 0.35 |
|                             | 00030 Pentose phosphate pathway                   | RER_31010                                    | 6-phosphogluconate dehydrogenase (gnd)                                      | 0.1  | 0.09 | 0.33 |
|                             | 00020 Citrate cycle (TCA cycle)                   | RER_44290                                    | succinyl-CoA synthetase beta subunit (sucC)                                 | 0.2  | 0.28 | 0.23 |
|                             | 00640 Propanoate metabolism                       | RER_44290                                    | succinyl-CoA synthetase beta subunit (sucC)                                 | 0.2  | 0.28 | 0.23 |
|                             | 00660 C5-Branched dibasic acid metabolism         | RER_44290                                    | succinyl-CoA synthetase beta subunit (sucC)                                 | 0.2  | 0.28 | 0.23 |
|                             | 00620 Pyruvate metabolism                         | RER_42680                                    | putative beta-ketoadipyl-CoA thiolase                                       | -    | 0.48 | 0.2  |
|                             | 00630 Glyoxylate and dicarboxylate metabolism     | RER_42680                                    | putative beta-ketoadipyl-CoA thiolase                                       | -    | 0.48 | 0.2  |
|                             | 00640 Propanoate metabolism                       | RER_42680                                    | putative beta-ketoadipyl-CoA thiolase                                       | -    | 0.48 | 0.2  |
|                             | 00650 Butanoate metabolism                        | RER_42680                                    | putative beta-ketoadipyl-CoA thiolase                                       | -    | 0.48 | 0.2  |
|                             | 00520 Amino sugar and nucleotide sugar metabolism | RER_39570                                    | glucosamine-6-phosphate deaminase, glucosamine-6-phosphate isomerase (nagB) | -    | -    | 0.17 |
|                             | 00020 Citrate cycle (TCA cycle)                   | RER_24250                                    | pyruvate carboxylase (pyc)                                                  | 0.04 | 0.22 | 0.17 |
|                             | 00620 Pyruvate metabolism                         | RER_24250                                    | pyruvate carboxylase (pyc)                                                  | 0.04 | 0.22 | 0.17 |
|                             | 00650 Butanoate metabolism                        | RER_56680                                    | putative 3-hydroxybutyryl-CoA dehydrogenase (hbd)                           | -    | 0.38 | 0.17 |
| 00640 Propanoate metabolism | RER_03810                                         | fatty oxidation complex alpha subunit (fadB) | -                                                                           | -    | 0.16 |      |

|                                                   |           |                                                                                   |      |      |      |
|---------------------------------------------------|-----------|-----------------------------------------------------------------------------------|------|------|------|
| 00650 Butanoate metabolism                        | RER_03810 | fatty oxidation complex alpha subunit (fadB)                                      | -    | -    | 0.16 |
| 00010 Glycolysis / Gluconeogenesis                | RER_15390 | dihydrolipoamide dehydrogenase (lpd)                                              | -    | 0.23 | 0.14 |
| 00020 Citrate cycle (TCA cycle)                   | RER_15390 | dihydrolipoamide dehydrogenase (lpd)                                              | -    | 0.23 | 0.14 |
| 00620 Pyruvate metabolism                         | RER_15390 | dihydrolipoamide dehydrogenase (lpd)                                              | -    | 0.23 | 0.14 |
| 00520 Amino sugar and nucleotide sugar metabolism | RER_39610 | phosphotransferase system enzyme IIC component, PTS sugar-specific EIIC component | -    | 0.13 | 0.13 |
| 00010 Glycolysis / Gluconeogenesis                | RER_33460 | pyruvate kinase (pyk)                                                             | 0.17 | 0.29 | 0.12 |
| 00620 Pyruvate metabolism                         | RER_33460 | pyruvate kinase (pyk)                                                             | 0.17 | 0.29 | 0.12 |
| 00630 Glyoxylate and dicarboxylate metabolism     | RER_36230 | glutamine synthetase I, glutamate--ammonia ligase (glnA, glnA1)                   | -    | -    | 0.11 |
| 00620 Pyruvate metabolism                         | RER_32170 | malate synthase (glcB, aceB)                                                      | 0.05 | 0.37 | 0.11 |
| 00630 Glyoxylate and dicarboxylate metabolism     | RER_32170 | malate synthase (glcB, aceB)                                                      | 0.05 | 0.37 | 0.11 |
| 00020 Citrate cycle (TCA cycle)                   | RER_20420 | succinate dehydrogenase iron-sulfur protein (sdhB)                                | 0.21 | -    | 0.11 |
| 00650 Butanoate metabolism                        | RER_20420 | succinate dehydrogenase iron-sulfur protein (sdhB)                                | 0.21 | -    | 0.11 |
| 00640 Propanoate metabolism                       | RER_06160 | putative enoyl-CoA isomerase                                                      | -    | 0.02 | 0.11 |
| 00650 Butanoate metabolism                        | RER_06160 | putative enoyl-CoA isomerase                                                      | -    | 0.02 | 0.11 |
| 00562 Inositol phosphate metabolism               | RER_58450 | myo-inositol-1-phosphate synthase (ino1)                                          | 0.2  | -    | 0.1  |
| 00640 Propanoate metabolism                       | RER_39530 | putative enoyl-CoA hydratase                                                      | -    | -    | 0.09 |
| 00650 Butanoate metabolism                        | RER_39530 | putative enoyl-CoA hydratase                                                      | -    | -    | 0.09 |
| 00562 Inositol phosphate metabolism               | RER_20190 | putative 5-deoxy-glucuronate isomerase (iolB)                                     | -    | 1.03 | 0.09 |
| 00030 Pentose phosphate pathway                   | RER_30440 | probable transaldolase (tal)                                                      | 1.24 | 0.37 | 0.08 |
| 00630 Glyoxylate and dicarboxylate metabolism     | RER_21310 | propionyl-CoA carboxylase beta chain, carboxyltransferase (pccB)                  | -    | -    | 0.08 |
| 00640 Propanoate metabolism                       | RER_21310 | propionyl-CoA carboxylase beta chain, carboxyltransferase (pccB)                  | -    | -    | 0.08 |
| 00010 Glycolysis / Gluconeogenesis                | RER_59850 | branched-chain alpha-keto acid dehydrogenase E1 beta subunit                      | -    | -    | 0.08 |
| 00020 Citrate cycle (TCA cycle)                   | RER_59850 | branched-chain alpha-keto acid dehydrogenase E1 beta subunit                      | -    | -    | 0.08 |
| 00620 Pyruvate metabolism                         | RER_59850 | branched-chain alpha-keto acid dehydrogenase E1 beta subunit                      | -    | -    | 0.08 |
| 00650 Butanoate metabolism                        | RER_59850 | branched-chain alpha-keto acid dehydrogenase E1 beta subunit                      | -    | -    | 0.08 |
| 00020 Citrate cycle (TCA cycle)                   | RER_44280 | succinyl-CoA synthetase alpha subunit (sucD)                                      | -    | 0.13 | 0.07 |
| 00640 Propanoate metabolism                       | RER_44280 | succinyl-CoA synthetase alpha subunit (sucD)                                      | -    | 0.13 | 0.07 |
| 00660 C5-Branched dibasic acid metabolism         | RER_44280 | succinyl-CoA synthetase alpha subunit (sucD)                                      | -    | 0.13 | 0.07 |

|                                                   |           |                                                                             |      |      |      |
|---------------------------------------------------|-----------|-----------------------------------------------------------------------------|------|------|------|
| 00020 Citrate cycle (TCA cycle)                   | RER_20440 | putative succinate dehydrogenase hydrophobic membrane anchor protein (sdhD) | 0.05 | -    | 0.06 |
| 00650 Butanoate metabolism                        | RER_20440 | putative succinate dehydrogenase hydrophobic membrane anchor protein (sdhD) | 0.05 | -    | 0.06 |
| 00010 Glycolysis / Gluconeogenesis                | RER_18100 | aldehyde dehydrogenase                                                      | -    | -    | 0.05 |
| 00040 Pentose and glucuronate interconversions    | RER_18100 | aldehyde dehydrogenase                                                      | -    | -    | 0.05 |
| 00053 Ascorbate and aldarate metabolism           | RER_18100 | aldehyde dehydrogenase                                                      | -    | -    | 0.05 |
| 00620 Pyruvate metabolism                         | RER_18100 | aldehyde dehydrogenase                                                      | -    | -    | 0.05 |
| 00640 Propanoate metabolism                       | RER_18100 | aldehyde dehydrogenase                                                      | -    | -    | 0.05 |
| 00640 Propanoate metabolism                       | RER_23640 | putative enoyl-CoA hydratase                                                | 0.09 | -    | 0.04 |
| 00650 Butanoate metabolism                        | RER_23640 | putative enoyl-CoA hydratase                                                | 0.09 | -    | 0.04 |
| 00010 Glycolysis / Gluconeogenesis                | RER_28170 | polyphosphate glucokinase, polyphosphate--glucose phosphotransferase (ppgK) | -    | -    | 0.04 |
| 00520 Amino sugar and nucleotide sugar metabolism | RER_28170 | polyphosphate glucokinase, polyphosphate--glucose phosphotransferase (ppgK) | -    | -    | 0.04 |
| 00650 Butanoate metabolism                        | RER_23970 | acetolactate synthase large subunit, acetohydroxyacid synthase (ilvB)       | 0.06 | 0.06 | 0.03 |
| 00660 C5-Branched dibasic acid metabolism         | RER_23970 | acetolactate synthase large subunit, acetohydroxyacid synthase (ilvB)       | 0.06 | 0.06 | 0.03 |
| 00620 Pyruvate metabolism                         | RER_26040 | malate--quinone oxidoreductase (mqo)                                        | -    | 0.24 | 0    |
| 00010 Glycolysis / Gluconeogenesis                | RER_14120 | fructose-bisphosphate aldolase class II (fba, fda)                          | 0.37 | 0.1  | -    |
| 00030 Pentose phosphate pathway                   | RER_14120 | fructose-bisphosphate aldolase class II (fba, fda)                          | 0.37 | 0.1  | -    |
| 00051 Fructose and mannose metabolism             | RER_14120 | fructose-bisphosphate aldolase class II (fba, fda)                          | 0.37 | 0.1  | -    |
| 00620 Pyruvate metabolism                         | RER_04110 | 2-isopropylmalate synthase (leuA)                                           | -    | 0.03 | -    |
| 00640 Propanoate metabolism                       | RER_06160 | putative enoyl-CoA isomerase                                                | -    | 0.02 | -    |
| 00650 Butanoate metabolism                        | RER_06160 | putative enoyl-CoA isomerase                                                | -    | 0.02 | -    |
| 00620 Pyruvate metabolism                         | RER_12070 | acetyl-CoA acetyltransferase, acetoacetyl-CoA thiolase                      | -    | 0.04 | -    |
| 00630 Glyoxylate and dicarboxylate metabolism     | RER_12070 | acetyl-CoA acetyltransferase, acetoacetyl-CoA thiolase                      | -    | 0.04 | -    |
| 00640 Propanoate metabolism                       | RER_12070 | acetyl-CoA acetyltransferase, acetoacetyl-CoA thiolase                      | -    | 0.04 | -    |
| 00650 Butanoate metabolism                        | RER_12070 | acetyl-CoA acetyltransferase, acetoacetyl-CoA thiolase                      | -    | 0.04 | -    |
| 00630 Glyoxylate and dicarboxylate metabolism     | RER_15740 | isocitrate lyase (aceA, icl)                                                | -    | 0.87 | -    |
| 00010 Glycolysis / Gluconeogenesis                | RER_20810 | putative oxidoreductase                                                     | -    | 0.09 | -    |



|                   |                                                   |           |                                                                                   |      |      |      |
|-------------------|---------------------------------------------------|-----------|-----------------------------------------------------------------------------------|------|------|------|
|                   | 00020 Citrate cycle (TCA cycle)                   | RER_20810 | putative oxidoreductase                                                           | -    | 0.09 | -    |
|                   | 00620 Pyruvate metabolism                         | RER_20810 | putative oxidoreductase                                                           | -    | 0.09 | -    |
|                   | 00010 Glycolysis / Gluconeogenesis                | RER_30300 | phosphoglycerate kinase (pgk)                                                     | -    | 0.35 | -    |
|                   | 00620 Pyruvate metabolism                         | RER_38940 | acetyl-CoA acetyltransferase, acetoacetyl-CoA thiolase                            | -    | 0.04 | -    |
|                   | 00630 Glyoxylate and dicarboxylate metabolism     | RER_38940 | acetyl-CoA acetyltransferase, acetoacetyl-CoA thiolase                            | -    | 0.04 | -    |
|                   | 00640 Propanoate metabolism                       | RER_38940 | acetyl-CoA acetyltransferase, acetoacetyl-CoA thiolase                            | -    | 0.04 | -    |
|                   | 00650 Butanoate metabolism                        | RER_38940 | acetyl-CoA acetyltransferase, acetoacetyl-CoA thiolase                            | -    | 0.04 | -    |
|                   | 00520 Amino sugar and nucleotide sugar metabolism | RER_39610 | phosphotransferase system enzyme IIC component, PTS sugar-specific EIIC component | -    | 0.13 | -    |
|                   | 00010 Glycolysis / Gluconeogenesis                | RER_39630 | phosphotransferase system enzyme IIA component, PTS sugar-specific EIIA component | -    | 0.1  | -    |
|                   | 00500 Starch and sucrose metabolism               | RER_39630 | phosphotransferase system enzyme IIA component, PTS sugar-specific EIIA component | -    | 0.1  | -    |
|                   | 00520 Amino sugar and nucleotide sugar metabolism | RER_39630 | phosphotransferase system enzyme IIA component, PTS sugar-specific EIIA component | -    | 0.1  | -    |
|                   | 00650 Butanoate metabolism                        | RER_50070 | putative 3-hydroxybutyryl-CoA dehydrogenase (hbd)                                 | -    | 0.23 | -    |
|                   | 00650 Butanoate metabolism                        | RER_56680 | putative 3-hydroxybutyryl-CoA dehydrogenase (hbd)                                 | -    | 0.38 | -    |
|                   | 00010 Glycolysis / Gluconeogenesis                | RER_10900 | GTP-dependent phosphoenolpyruvate carboxykinase (pckG)                            | 0.03 | -    | -    |
|                   | 00020 Citrate cycle (TCA cycle)                   | RER_10900 | GTP-dependent phosphoenolpyruvate carboxykinase (pckG)                            | 0.03 | -    | -    |
|                   | 00620 Pyruvate metabolism                         | RER_10900 | GTP-dependent phosphoenolpyruvate carboxykinase (pckG)                            | 0.03 | -    | -    |
|                   | 00010 Glycolysis / Gluconeogenesis                | RER_30310 | triose-phosphate isomerase (tpiA)                                                 | 0.34 | -    | -    |
|                   | 00051 Fructose and mannose metabolism             | RER_30310 | triose-phosphate isomerase (tpiA)                                                 | 0.34 | -    | -    |
|                   | 00562 Inositol phosphate metabolism               | RER_30310 | triose-phosphate isomerase (tpiA)                                                 | 0.34 | -    | -    |
|                   | 00030 Pentose phosphate pathway                   | RER_38190 | ribose-5-phosphate isomerase B, phosphoriboisomerase B (rpiB)                     | 0.04 | -    | -    |
|                   | 00500 Starch and sucrose metabolism               | RER_38890 | putative glucanase (glgE)                                                         | 0.06 | -    | -    |
|                   | 00020 Citrate cycle (TCA cycle)                   | RER_42400 | fumarate hydratase class II, fumarase C (fumC)                                    | 0.09 | -    | -    |
|                   | 00030 Pentose phosphate pathway                   | RER_43110 | phosphoribosylpyrophosphate synthase, ribose-phosphate diphosphokinase (prs)      | 0.27 | -    | -    |
| Energy metabolism | 00720 Carbon fixation pathways in prokaryotes     | RER_30680 | aconitase, aconitate hydratase (acn)                                              | 0.38 | 0.35 | 2.61 |
|                   | 00190 Oxidative phosphorylation                   | RER_39050 | ATP synthase beta chain (atpD)                                                    | 1.42 | 0.72 | 1.7  |
|                   | 00195 Photosynthesis                              | RER_39050 | ATP synthase beta chain (atpD)                                                    | 1.42 | 0.72 | 1.7  |

|                                                   |           |                                                                              |      |      |      |
|---------------------------------------------------|-----------|------------------------------------------------------------------------------|------|------|------|
| 00190 Oxidative phosphorylation                   | RER_39070 | ATP synthase alpha chain (atpA)                                              | 0.71 | 1.12 | 0.94 |
| 00195 Photosynthesis                              | RER_39070 | ATP synthase alpha chain (atpA)                                              | 0.71 | 1.12 | 0.94 |
| 00920 Sulfur metabolism                           | RER_56710 | putative NADPH--sulfite reductase flavoprotein alpha-component (cysJ)        | -    | -    | 0.64 |
| 00720 Carbon fixation pathways in prokaryotes     | RER_20050 | NADP-dependent isocitrate dehydrogenase (icd)                                | 0.13 | 0.8  | 0.56 |
| 00910 Nitrogen metabolism                         | RER_23730 | putative electron transfer flavoprotein beta subunit (etfB, fixA)            | 0.29 | 1.85 | 0.52 |
| 00680 Methane metabolism                          | RER_42830 | enolase, phosphopyruvate hydratase (eno)                                     | 0.3  | 0.08 | 0.42 |
| 00190 Oxidative phosphorylation                   | RER_39080 | ATP synthase delta chain (atpH)                                              | 0.83 | 0.08 | 0.31 |
| 00195 Photosynthesis                              | RER_39080 | ATP synthase delta chain (atpH)                                              | 0.83 | 0.08 | 0.31 |
| 00190 Oxidative phosphorylation                   | RER_35970 | menaquinol-cytochrome c reductase iron-sulfur protein (qcrA)                 | 0.12 | -    | 0.3  |
| 00190 Oxidative phosphorylation                   | RER_39090 | ATP synthase subunit b (atpF)                                                | -    | 0.1  | 0.27 |
| 00195 Photosynthesis                              | RER_39090 | ATP synthase subunit b (atpF)                                                | -    | 0.1  | 0.27 |
| 00720 Carbon fixation pathways in prokaryotes     | RER_44290 | succinyl-CoA synthetase beta subunit (sucC)                                  | 0.2  | 0.28 | 0.23 |
| 00920 Sulfur metabolism                           | RER_16530 | sulfate adenyllyltransferase subunit 2, ATP sulfurylase small subunit (cysD) | -    | -    | 0.22 |
| 00910 Nitrogen metabolism                         | RER_23740 | putative electron transfer flavoprotein alpha subunit (etfA, fixB)           | 0.47 | 0.98 | 0.21 |
| 00720 Carbon fixation pathways in prokaryotes     | RER_42680 | putative beta-ketoacyl-CoA thiolase                                          | -    | 0.48 | 0.2  |
| 00190 Oxidative phosphorylation                   | RER_31110 | probable NADH dehydrogenase (ndh)                                            | -    | -    | 0.17 |
| 00720 Carbon fixation pathways in prokaryotes     | RER_24250 | pyruvate carboxylase (pyc)                                                   | 0.04 | 0.22 | 0.17 |
| 00720 Carbon fixation pathways in prokaryotes     | RER_03810 | fatty oxidation complex alpha subunit (fadB)                                 | -    | -    | 0.16 |
| 00190 Oxidative phosphorylation                   | RER_39060 | ATP synthase gamma chain (atpG)                                              | -    | -    | 0.14 |
| 00195 Photosynthesis                              | RER_39060 | ATP synthase gamma chain (atpG)                                              | -    | -    | 0.14 |
| 00710 Carbon fixation in photosynthetic organisms | RER_33460 | pyruvate kinase (pyk)                                                        | 0.17 | 0.29 | 0.12 |
| 00910 Nitrogen metabolism                         | RER_36230 | glutamine synthetase I, glutamate--ammonia ligase (glnA, glnA1)              | -    | -    | 0.11 |
| 00190 Oxidative phosphorylation                   | RER_20420 | succinate dehydrogenase iron-sulfur protein (sdhB)                           | 0.21 | -    | 0.11 |
| 00720 Carbon fixation pathways in prokaryotes     | RER_20420 | succinate dehydrogenase iron-sulfur protein (sdhB)                           | 0.21 | -    | 0.11 |
| 00680 Methane metabolism                          | RER_24000 | D-3-phosphoglycerate dehydrogenase (serA)                                    | 0.14 | -    | 0.1  |
| 00720 Carbon fixation pathways in prokaryotes     | RER_21310 | propionyl-CoA carboxylase beta chain, carboxyltransferase (pccB)             | -    | -    | 0.08 |
| 00720 Carbon fixation pathways in prokaryotes     | RER_44280 | succinyl-CoA synthetase alpha subunit (sucD)                                 | -    | 0.13 | 0.07 |
| 00910 Nitrogen metabolism                         | RER_38460 | NADP-dependent glutamate dehydrogenase (gdhA)                                | -    | -    | 0.07 |

|                  |                                                   |           |                                                                                             |      |      |      |
|------------------|---------------------------------------------------|-----------|---------------------------------------------------------------------------------------------|------|------|------|
|                  | 00190 Oxidative phosphorylation                   | RER_20440 | putative succinate dehydrogenase hydrophobic membrane anchor protein (sdhD)                 | 0.05 | -    | 0.06 |
|                  | 00720 Carbon fixation pathways in prokaryotes     | RER_20440 | putative succinate dehydrogenase hydrophobic membrane anchor protein (sdhD)                 | 0.05 | -    | 0.06 |
|                  | 00710 Carbon fixation in photosynthetic organisms | RER_14120 | fructose-bisphosphate aldolase class II (fba, fda)                                          | 0.37 | 0.1  | -    |
|                  | 00680 Methane metabolism                          | RER_14120 | fructose-bisphosphate aldolase class II (fba, fda)                                          | 0.37 | 0.1  | -    |
|                  | 00190 Oxidative phosphorylation                   | RER_39040 | ATP synthase epsilon chain (atpC)                                                           | 0.04 | 0.07 | -    |
|                  | 00195 Photosynthesis                              | RER_39040 | ATP synthase epsilon chain (atpC)                                                           | 0.04 | 0.07 | -    |
|                  | 00720 Carbon fixation pathways in prokaryotes     | RER_12070 | acetyl-CoA acetyltransferase, acetoacetyl-CoA thiolase                                      | -    | 0.04 | -    |
|                  | 00680 Methane metabolism                          | RER_12250 | catalase-peroxidase (katG)                                                                  | -    | 0.08 | -    |
|                  | 00920 Sulfur metabolism                           | RER_20020 | homoserine O-acetyltransferase (metX, metA)                                                 | -    | 1.15 | -    |
|                  | 00710 Carbon fixation in photosynthetic organisms | RER_30300 | phosphoglycerate kinase (pgk)                                                               | -    | 0.35 | -    |
|                  | 00720 Carbon fixation pathways in prokaryotes     | RER_38940 | acetyl-CoA acetyltransferase, acetoacetyl-CoA thiolase                                      | -    | 0.04 | -    |
|                  | 00920 Sulfur metabolism                           | RER_16520 | putative sugar-phosphate phosphatase                                                        | 0.22 | -    | -    |
|                  | 00710 Carbon fixation in photosynthetic organisms | RER_30310 | triose-phosphate isomerase (tpiA)                                                           | 0.34 | -    | -    |
|                  | 00710 Carbon fixation in photosynthetic organisms | RER_38190 | ribose-5-phosphate isomerase B, phosphoriboisomerase B (rpiB)                               | 0.04 | -    | -    |
|                  | 00720 Carbon fixation pathways in prokaryotes     | RER_42400 | fumarate hydratase class II, fumarase C (fumC)                                              | 0.09 | -    | -    |
| Lipid metabolism | 00071 Fatty acid metabolism                       | RER_56240 | putative acetyl-CoA acyltransferase, acyl-CoA thiolase                                      | -    | -    | 0.57 |
|                  | 00592 alpha-Linolenic acid metabolism             | RER_56240 | putative acetyl-CoA acyltransferase, acyl-CoA thiolase                                      | -    | -    | 0.57 |
|                  | 00071 Fatty acid metabolism                       | RER_42680 | putative beta-ketoadipyl-CoA thiolase                                                       | -    | 0.48 | 0.2  |
|                  | 00072 Synthesis and degradation of ketone bodies  | RER_42680 | putative beta-ketoadipyl-CoA thiolase                                                       | -    | 0.48 | 0.2  |
|                  | 00071 Fatty acid metabolism                       | RER_03810 | fatty oxidation complex alpha subunit (fadB)                                                | -    | -    | 0.16 |
|                  | 01040 Biosynthesis of unsaturated fatty acids     | RER_03810 | fatty oxidation complex alpha subunit (fadB)                                                | -    | -    | 0.16 |
|                  | 00061 Fatty acid biosynthesis                     | RER_21210 | acyl-CoA carboxylase alpha chain, biotin carboxylase/biotin carboxyl carrier protein (accA) | -    | 0.16 | 0.14 |
|                  | 00071 Fatty acid metabolism                       | RER_06160 | putative enoyl-CoA isomerase                                                                | -    | 0.02 | 0.11 |
|                  | 00071 Fatty acid metabolism                       | RER_39530 | putative enoyl-CoA hydratase                                                                | -    | -    | 0.09 |
|                  | 00071 Fatty acid metabolism                       | RER_18100 | aldehyde dehydrogenase                                                                      | -    | -    | 0.05 |
|                  | 00561 Glycerolipid metabolism                     | RER_18100 | aldehyde dehydrogenase                                                                      | -    | -    | 0.05 |
|                  | 00071 Fatty acid metabolism                       | RER_23640 | putative enoyl-CoA hydratase                                                                | 0.09 | -    | 0.04 |
|                  | 00071 Fatty acid metabolism                       | RER_06160 | putative enoyl-CoA isomerase                                                                | -    | 0.02 | -    |

|                         |                                                   |                                                                              |                                                                                                                         |      |      |      |
|-------------------------|---------------------------------------------------|------------------------------------------------------------------------------|-------------------------------------------------------------------------------------------------------------------------|------|------|------|
|                         | 00071 Fatty acid metabolism                       | RER_12070                                                                    | acetyl-CoA acetyltransferase, acetoacetyl-CoA thiolase                                                                  | -    | 0.04 | -    |
|                         | 00072 Synthesis and degradation of ketone bodies  | RER_12070                                                                    | acetyl-CoA acetyltransferase, acetoacetyl-CoA thiolase                                                                  | -    | 0.04 | -    |
|                         | 00071 Fatty acid metabolism                       | RER_38940                                                                    | acetyl-CoA acetyltransferase, acetoacetyl-CoA thiolase                                                                  | -    | 0.04 | -    |
|                         | 00072 Synthesis and degradation of ketone bodies  | RER_38940                                                                    | acetyl-CoA acetyltransferase, acetoacetyl-CoA thiolase                                                                  | -    | 0.04 | -    |
|                         | 00071 Fatty acid metabolism                       | RER_40330                                                                    | probable long-chain fatty-acid--CoA ligase, acyl-CoA synthetase (fadD)                                                  | -    | 0.21 | -    |
|                         | 00561 Glycerolipid metabolism                     | RER_35800                                                                    | putative acyltransferase                                                                                                | 0.13 | -    | -    |
|                         | 00564 Glycerophospholipid metabolism              | RER_35800                                                                    | putative acyltransferase                                                                                                | 0.13 | -    | -    |
| Nucleotide metabolism   | 00230 Purine metabolism                           | RER_17340                                                                    | DNA-directed RNA polymerase beta' chain (rpoC)                                                                          | 0.13 | 0.18 | 0.68 |
|                         | 00240 Pyrimidine metabolism                       | RER_17340                                                                    | DNA-directed RNA polymerase beta' chain (rpoC)                                                                          | 0.13 | 0.18 | 0.68 |
|                         | 00230 Purine metabolism                           | RER_35310                                                                    | DNA polymerase III alpha subunit (dnaE)                                                                                 | -    | -    | 0.43 |
|                         | 00240 Pyrimidine metabolism                       | RER_35310                                                                    | DNA polymerase III alpha subunit (dnaE)                                                                                 | -    | -    | 0.43 |
|                         | 00230 Purine metabolism                           | RER_16530                                                                    | sulfate adenylyltransferase subunit 2, ATP sulfurylase small subunit (cysD)                                             | -    | -    | 0.22 |
|                         | 00230 Purine metabolism                           | RER_19330                                                                    | inosine-5'-monophosphate dehydrogenase, IMP dehydrogenase (guaB)                                                        | -    | 0.08 | 0.21 |
|                         | 00230 Purine metabolism                           | RER_17330                                                                    | DNA-directed RNA polymerase beta chain (rpoB)                                                                           | -    | 0.37 | 0.18 |
|                         | 00240 Pyrimidine metabolism                       | RER_17330                                                                    | DNA-directed RNA polymerase beta chain (rpoB)                                                                           | -    | 0.37 | 0.18 |
|                         | 00230 Purine metabolism                           | RER_26440                                                                    | guanosine pentaphosphate synthetase/polynucleotide phosphorylase, polyribonucleotide nucleotidyltransferase (gpsI, pnp) | 0.05 | 0.34 | 0.12 |
|                         | 00240 Pyrimidine metabolism                       | RER_26440                                                                    | guanosine pentaphosphate synthetase/polynucleotide phosphorylase, polyribonucleotide nucleotidyltransferase (gpsI, pnp) | 0.05 | 0.34 | 0.12 |
|                         | 00230 Purine metabolism                           | RER_33460                                                                    | pyruvate kinase (pyk)                                                                                                   | 0.17 | 0.29 | 0.12 |
|                         | 00230 Purine metabolism                           | RER_18810                                                                    | DNA-directed RNA polymerase alpha chain (rpoA)                                                                          | 0.1  | -    | 0.09 |
|                         | 00240 Pyrimidine metabolism                       | RER_18810                                                                    | DNA-directed RNA polymerase alpha chain (rpoA)                                                                          | 0.1  | -    | 0.09 |
|                         | 00230 Purine metabolism                           | RER_10470                                                                    | phosphoribosylformylglycinamide synthase I, formylglycinamide ribonucleotide amidotransferase (purQ)                    | -    | 0.26 | -    |
| 00230 Purine metabolism | RER_43110                                         | phosphoribosylpyrophosphate synthase, ribose-phosphate diphosphokinase (prs) | 0.27                                                                                                                    | -    | -    |      |
| Amino acid metabolism   | 00300 Lysine biosynthesis                         | RER_30680                                                                    | aconitase, aconitate hydratase (acn)                                                                                    | 0.38 | 0.35 | 2.61 |
|                         | 00290 Valine, leucine and isoleucine biosynthesis | RER_23990                                                                    | ketol-acid reductoisomerase, acetoxyhydroxy acid                                                                        | 1.58 | 0.68 | 1.71 |

|                                                   |           |                                                                       |      |      |      |
|---------------------------------------------------|-----------|-----------------------------------------------------------------------|------|------|------|
|                                                   |           | isomeroreductase (ilvC)                                               |      |      |      |
| 00310 Lysine degradation                          | RER_36170 | dihydrolipoamide acyltransferase                                      | 1.13 | 0.31 | 1.63 |
| 00280 Valine, leucine and isoleucine degradation  | RER_39550 | methylmalonate-semialdehyde dehydrogenase (mmsA)                      | 0.56 | -    | 1.04 |
| 00280 Valine, leucine and isoleucine degradation  | RER_56240 | putative acetyl-CoA acyltransferase, acyl-CoA thiolase                | -    | -    | 0.57 |
| 00290 Valine, leucine and isoleucine biosynthesis | RER_23980 | acetolactate synthase small subunit, acetohydroxyacid synthase (ilvN) | 0.13 | 0.22 | 0.35 |
| 00280 Valine, leucine and isoleucine degradation  | RER_42680 | putative beta-ketoadipyl-CoA thiolase                                 | -    | 0.48 | 0.2  |
| 00310 Lysine degradation                          | RER_42680 | putative beta-ketoadipyl-CoA thiolase                                 | -    | 0.48 | 0.2  |
| 00380 Tryptophan metabolism                       | RER_42680 | putative beta-ketoadipyl-CoA thiolase                                 | -    | 0.48 | 0.2  |
| 00360 Phenylalanine metabolism                    | RER_56680 | putative 3-hydroxybutyryl-CoA dehydrogenase (hbd)                     | -    | 0.38 | 0.17 |
| 00280 Valine, leucine and isoleucine degradation  | RER_03810 | fatty oxidation complex alpha subunit (fadB)                          | -    | -    | 0.16 |
| 00310 Lysine degradation                          | RER_03810 | fatty oxidation complex alpha subunit (fadB)                          | -    | -    | 0.16 |
| 00380 Tryptophan metabolism                       | RER_03810 | fatty oxidation complex alpha subunit (fadB)                          | -    | -    | 0.16 |
| 00260 Glycine, serine and threonine metabolism    | RER_15390 | dihydrolipoamide dehydrogenase (lpd)                                  | -    | 0.23 | 0.14 |
| 00280 Valine, leucine and isoleucine degradation  | RER_15390 | dihydrolipoamide dehydrogenase (lpd)                                  | -    | 0.23 | 0.14 |
| 00350 Tyrosine metabolism                         | RER_54270 | putative phenol hydroxylase                                           | -    | -    | 0.14 |
| 00250 Alanine, aspartate and glutamate metabolism | RER_36230 | glutamine synthetase I, glutamate--ammonia ligase (glnA, glnA1)       | -    | -    | 0.11 |
| 00330 Arginine and proline metabolism             | RER_36230 | glutamine synthetase I, glutamate--ammonia ligase (glnA, glnA1)       | -    | -    | 0.11 |
| 00280 Valine, leucine and isoleucine degradation  | RER_06160 | putative enoyl-CoA isomerase                                          | -    | 0.02 | 0.11 |
| 00310 Lysine degradation                          | RER_06160 | putative enoyl-CoA isomerase                                          | -    | 0.02 | 0.11 |
| 00360 Phenylalanine metabolism                    | RER_06160 | putative enoyl-CoA isomerase                                          | -    | 0.02 | 0.11 |
| 00380 Tryptophan metabolism                       | RER_06160 | putative enoyl-CoA isomerase                                          | -    | 0.02 | 0.11 |
| 00260 Glycine, serine and threonine metabolism    | RER_24000 | D-3-phosphoglycerate dehydrogenase (serA)                             | 0.14 | -    | 0.1  |
| 00280 Valine, leucine and isoleucine degradation  | RER_39530 | putative enoyl-CoA hydratase                                          | -    | -    | 0.09 |
| 00310 Lysine degradation                          | RER_39530 | putative enoyl-CoA hydratase                                          | -    | -    | 0.09 |
| 00360 Phenylalanine metabolism                    | RER_39530 | putative enoyl-CoA hydratase                                          | -    | -    | 0.09 |
| 00380 Tryptophan metabolism                       | RER_39530 | putative enoyl-CoA hydratase                                          | -    | -    | 0.09 |
| 00280 Valine, leucine and isoleucine degradation  | RER_21310 | propionyl-CoA carboxylase beta chain, carboxyltransferase (pccB)      | -    | -    | 0.08 |
| 00300 Lysine biosynthesis                         | RER_39230 | diaminopimelate decarboxylase (lysA)                                  | -    | -    | 0.08 |

|                                                   |           |                                                                        |      |      |      |
|---------------------------------------------------|-----------|------------------------------------------------------------------------|------|------|------|
| 00250 Alanine, aspartate and glutamate metabolism | RER_38460 | NADP-dependent glutamate dehydrogenase (gdhA)                          | -    | -    | 0.07 |
| 00330 Arginine and proline metabolism             | RER_38460 | NADP-dependent glutamate dehydrogenase (gdhA)                          | -    | -    | 0.07 |
| 00290 Valine, leucine and isoleucine biosynthesis | RER_24010 | 3-isopropylmalate dehydrogenase (leuB)                                 | -    | -    | 0.06 |
| 00280 Valine, leucine and isoleucine degradation  | RER_18100 | aldehyde dehydrogenase                                                 | -    | -    | 0.05 |
| 00310 Lysine degradation                          | RER_18100 | aldehyde dehydrogenase                                                 | -    | -    | 0.05 |
| 00330 Arginine and proline metabolism             | RER_18100 | aldehyde dehydrogenase                                                 | -    | -    | 0.05 |
| 00340 Histidine metabolism                        | RER_18100 | aldehyde dehydrogenase                                                 | -    | -    | 0.05 |
| 00380 Tryptophan metabolism                       | RER_18100 | aldehyde dehydrogenase                                                 | -    | -    | 0.05 |
| 00280 Valine, leucine and isoleucine degradation  | RER_23640 | putative enoyl-CoA hydratase                                           | 0.09 | -    | 0.04 |
| 00310 Lysine degradation                          | RER_23640 | putative enoyl-CoA hydratase                                           | 0.09 | -    | 0.04 |
| 00360 Phenylalanine metabolism                    | RER_23640 | putative enoyl-CoA hydratase                                           | 0.09 | -    | 0.04 |
| 00380 Tryptophan metabolism                       | RER_23640 | putative enoyl-CoA hydratase                                           | 0.09 | -    | 0.04 |
| 00290 Valine, leucine and isoleucine biosynthesis | RER_23970 | acetolactate synthase large subunit, acetohydroxyacid synthase (ilvB)  | 0.06 | 0.06 | 0.03 |
| 00270 Cysteine and methionine metabolism          | RER_30110 | S-adenosylmethionine synthetase, methionine adenosyltransferase (metK) | 0.5  | 0.28 | -    |
| 00290 Valine, leucine and isoleucine biosynthesis | RER_04110 | 2-isopropylmalate synthase (leuA)                                      | -    | 0.03 | -    |
| 00260 Glycine, serine and threonine metabolism    | RER_04140 | aspartokinase (ask)                                                    | -    | 0.04 | -    |
| 00270 Cysteine and methionine metabolism          | RER_04140 | aspartokinase (ask)                                                    | -    | 0.04 | -    |
| 00300 Lysine biosynthesis                         | RER_04140 | aspartokinase (ask)                                                    | -    | 0.04 | -    |
| 00280 Valine, leucine and isoleucine degradation  | RER_06160 | putative enoyl-CoA isomerase                                           | -    | 0.02 | -    |
| 00310 Lysine degradation                          | RER_06160 | putative enoyl-CoA isomerase                                           | -    | 0.02 | -    |
| 00360 Phenylalanine metabolism                    | RER_06160 | putative enoyl-CoA isomerase                                           | -    | 0.02 | -    |
| 00380 Tryptophan metabolism                       | RER_06160 | putative enoyl-CoA isomerase                                           | -    | 0.02 | -    |
| 00280 Valine, leucine and isoleucine degradation  | RER_12070 | acetyl-CoA acetyltransferase, acetoacetyl-CoA thiolase                 | -    | 0.04 | -    |
| 00310 Lysine degradation                          | RER_12070 | acetyl-CoA acetyltransferase, acetoacetyl-CoA thiolase                 | -    | 0.04 | -    |
| 00380 Tryptophan metabolism                       | RER_12070 | acetyl-CoA acetyltransferase, acetoacetyl-CoA thiolase                 | -    | 0.04 | -    |
| 00360 Phenylalanine metabolism                    | RER_12250 | catalase-peroxidase (katG)                                             | -    | 0.08 | -    |
| 00380 Tryptophan metabolism                       | RER_12250 | catalase-peroxidase (katG)                                             | -    | 0.08 | -    |
| 00270 Cysteine and methionine metabolism          | RER_20020 | homoserine O-acetyltransferase (metX, metA)                            | -    | 1.15 | -    |
| 00260 Glycine, serine and threonine metabolism    | RER_20810 | putative oxidoreductase                                                | -    | 0.09 | -    |

|                                    |                                                  |           |                                                                             |      |      |      |
|------------------------------------|--------------------------------------------------|-----------|-----------------------------------------------------------------------------|------|------|------|
|                                    | 00280 Valine, leucine and isoleucine degradation | RER_20810 | putative oxidoreductase                                                     | -    | 0.09 | -    |
|                                    | 00270 Cysteine and methionine metabolism         | RER_21660 | adenosylhomocysteinase, S-adenosyl-L-homocysteine hydrolase (ahcY)          | -    | 0.46 | -    |
|                                    | 00280 Valine, leucine and isoleucine degradation | RER_38940 | acetyl-CoA acetyltransferase, acetoacetyl-CoA thiolase                      | -    | 0.04 | -    |
|                                    | 00310 Lysine degradation                         | RER_38940 | acetyl-CoA acetyltransferase, acetoacetyl-CoA thiolase                      | -    | 0.04 | -    |
|                                    | 00380 Tryptophan metabolism                      | RER_38940 | acetyl-CoA acetyltransferase, acetoacetyl-CoA thiolase                      | -    | 0.04 | -    |
|                                    | 00270 Cysteine and methionine metabolism         | RER_48100 | putative thiosulfate sulfurtransferase, rhodanese                           | -    | 0.15 | -    |
|                                    | 00360 Phenylalanine metabolism                   | RER_50070 | putative 3-hydroxybutyryl-CoA dehydrogenase (hbd)                           | -    | 0.23 | -    |
|                                    | 00360 Phenylalanine metabolism                   | RER_56680 | putative 3-hydroxybutyryl-CoA dehydrogenase (hbd)                           | -    | 0.38 | -    |
|                                    | 00330 Arginine and proline metabolism            | RER_57110 | putative amidase                                                            | -    | 0.07 | -    |
|                                    | 00360 Phenylalanine metabolism                   | RER_57110 | putative amidase                                                            | -    | 0.07 | -    |
|                                    | 00380 Tryptophan metabolism                      | RER_57110 | putative amidase                                                            | -    | 0.07 | -    |
|                                    | 00340 Histidine metabolism                       | RER_23050 | histidinol-phosphate phosphatase, histidinol-phosphatase (hisN)             | 0.38 | -    | -    |
|                                    | 00300 Lysine biosynthesis                        | RER_27320 | dihydrodipicolinate synthase (dapA)                                         | 0.14 | -    | -    |
|                                    | 00340 Histidine metabolism                       | RER_34520 | histidinol dehydrogenase (hisD)                                             | 0.02 | -    | -    |
|                                    | 00280 Valine, leucine and isoleucine degradation | RER_39520 | 3-hydroxyisobutyrate dehydrogenase (mmsB)                                   | 0.17 | -    | -    |
| Metabolism of other amino acids    | 00410 beta-Alanine metabolism                    | RER_39550 | methylmalonate-semialdehyde dehydrogenase (mmsA)                            | 0.56 | -    | 1.04 |
|                                    | 00480 Glutathione metabolism                     | RER_20050 | NADP-dependent isocitrate dehydrogenase (icd)                               | 0.13 | 0.8  | 0.56 |
|                                    | 00480 Glutathione metabolism                     | RER_31010 | 6-phosphogluconate dehydrogenase (gnd)                                      | 0.1  | 0.09 | 0.33 |
|                                    | 00450 Selenocompound metabolism                  | RER_16530 | sulfate adenylyltransferase subunit 2, ATP sulfurylase small subunit (cysD) | -    | -    | 0.22 |
|                                    | 00410 beta-Alanine metabolism                    | RER_03810 | fatty oxidation complex alpha subunit (fadB)                                | -    | -    | 0.16 |
|                                    | 00410 beta-Alanine metabolism                    | RER_06160 | putative enoyl-CoA isomerase                                                | -    | 0.02 | 0.11 |
|                                    | 00410 beta-Alanine metabolism                    | RER_39530 | putative enoyl-CoA hydratase                                                | -    | -    | 0.09 |
|                                    | 00410 beta-Alanine metabolism                    | RER_18100 | aldehyde dehydrogenase                                                      | -    | -    | 0.05 |
|                                    | 00410 beta-Alanine metabolism                    | RER_23640 | putative enoyl-CoA hydratase                                                | 0.09 | -    | 0.04 |
|                                    | 00410 beta-Alanine metabolism                    | RER_06160 | putative enoyl-CoA isomerase                                                | -    | 0.02 | -    |
| Glycan biosynthesis and metabolism | 00550 Peptidoglycan biosynthesis                 | RER_60150 | conserved hypothetical membrane protein                                     | 0.32 | -    | -    |
|                                    | 00770 Pantothenate and CoA biosynthesis          | RER_23990 | ketol-acid reductoisomerase, acetohydroxy acid isomeroreductase (ilvC)      | 1.58 | 0.68 | 1.71 |

|                                             |                                         |           |                                                                                         |      |      |      |
|---------------------------------------------|-----------------------------------------|-----------|-----------------------------------------------------------------------------------------|------|------|------|
| Metabolism of cofactors and vitamins        | 00770 Pantothenate and CoA biosynthesis | RER_23980 | acetolactate synthase small subunit, acetohydroxyacid synthase (ilvN)                   | 0.13 | 0.22 | 0.35 |
|                                             | 00750 Vitamin B6 metabolism             | RER_29090 | probable pyridoxal phosphate synthase component Pdx1, PLP synthase subunit (pdx1, pdxS) | -    | -    | 0.05 |
|                                             | 00770 Pantothenate and CoA biosynthesis | RER_23970 | acetolactate synthase large subunit, acetohydroxyacid synthase (ilvB)                   | 0.06 | 0.06 | 0.03 |
|                                             | 00740 Riboflavin metabolism             | RER_30230 | 6,7-dimethyl-8-ribityllumazine synthase, riboflavin synthase beta chain (ribH, ribE)    | -    | -    | 0.02 |
|                                             | 00750 Vitamin B6 metabolism             | RER_32350 | phosphomethylpyrimidine kinase (thiD)                                                   | -    | 0.18 | -    |
| Metabolism of terpenoids and polyketides    | 00281 Geraniol degradation              | RER_56240 | putative acetyl-CoA acyltransferase, acyl-CoA thiolase                                  | -    | -    | 0.57 |
|                                             | 00900 Terpenoid backbone biosynthesis   | RER_42680 | putative beta-ketoadipyl-CoA thiolase                                                   | -    | 0.48 | 0.2  |
|                                             | 00903 Limonene and pinene degradation   | RER_03810 | fatty oxidation complex alpha subunit (fadB)                                            | -    | -    | 0.16 |
|                                             | 00281 Geraniol degradation              | RER_03810 | fatty oxidation complex alpha subunit (fadB)                                            | -    | -    | 0.16 |
|                                             | 00903 Limonene and pinene degradation   | RER_06160 | putative enoyl-CoA isomerase                                                            | -    | 0.02 | 0.11 |
|                                             | 00281 Geraniol degradation              | RER_06160 | putative enoyl-CoA isomerase                                                            | -    | 0.02 | 0.11 |
|                                             | 00903 Limonene and pinene degradation   | RER_39530 | putative enoyl-CoA hydratase                                                            | -    | -    | 0.09 |
|                                             | 00281 Geraniol degradation              | RER_39530 | putative enoyl-CoA hydratase                                                            | -    | -    | 0.09 |
|                                             | 00903 Limonene and pinene degradation   | RER_18100 | aldehyde dehydrogenase                                                                  | -    | -    | 0.05 |
|                                             | 00903 Limonene and pinene degradation   | RER_23640 | putative enoyl-CoA hydratase                                                            | 0.09 | -    | 0.04 |
|                                             | 00281 Geraniol degradation              | RER_23640 | putative enoyl-CoA hydratase                                                            | 0.09 | -    | 0.04 |
|                                             | 00903 Limonene and pinene degradation   | RER_06160 | putative enoyl-CoA isomerase                                                            | -    | 0.02 | -    |
|                                             | 00281 Geraniol degradation              | RER_06160 | putative enoyl-CoA isomerase                                                            | -    | 0.02 | -    |
|                                             | 00900 Terpenoid backbone biosynthesis   | RER_12070 | acetyl-CoA acetyltransferase, acetoacetyl-CoA thiolase                                  | -    | 0.04 | -    |
|                                             | 00900 Terpenoid backbone biosynthesis   | RER_38940 | acetyl-CoA acetyltransferase, acetoacetyl-CoA thiolase                                  | -    | 0.04 | -    |
| Biosynthesis of other secondary metabolites | 00521 Streptomycin biosynthesis         | RER_58450 | myo-inositol-1-phosphate synthase (ino1)                                                | 0.2  | -    | 0.1  |
|                                             | 00940 Phenylpropanoid biosynthesis      | RER_12250 | catalase-peroxidase (katG)                                                              | -    | 0.08 | -    |
| Xenobiotics biodegradation and metabolism   | 00362 Benzoate degradation              | RER_56240 | putative acetyl-CoA acyltransferase, acyl-CoA thiolase                                  | -    | -    | 0.57 |
|                                             | 00642 Ethylbenzene degradation          | RER_56240 | putative acetyl-CoA acyltransferase, acyl-CoA thiolase                                  | -    | -    | 0.57 |
|                                             | 00983 Drug metabolism - other enzymes   | RER_19330 | inosine-5'-monophosphate dehydrogenase, IMP dehydrogenase (guaB)                        | -    | 0.08 | 0.21 |
|                                             | 00362 Benzoate degradation              | RER_42680 | putative beta-ketoadipyl-CoA thiolase                                                   | -    | 0.48 | 0.2  |



|               |                                                 |           |                                                                                     |      |      |      |
|---------------|-------------------------------------------------|-----------|-------------------------------------------------------------------------------------|------|------|------|
|               | 00362 Benzoate degradation                      | RER_56680 | putative 3-hydroxybutyryl-CoA dehydrogenase (hbd)                                   | -    | 0.38 | 0.17 |
|               | 00930 Caprolactam degradation                   | RER_03810 | fatty oxidation complex alpha subunit (fadB)                                        | -    | -    | 0.16 |
|               | 00623 Toluene degradation                       | RER_20420 | succinate dehydrogenase iron-sulfur protein (sdhB)                                  | 0.21 | -    | 0.11 |
|               | 00362 Benzoate degradation                      | RER_06160 | putative enoyl-CoA isomerase                                                        | -    | 0.02 | 0.11 |
|               | 00627 Aminobenzoate degradation                 | RER_06160 | putative enoyl-CoA isomerase                                                        | -    | 0.02 | 0.11 |
|               | 00930 Caprolactam degradation                   | RER_06160 | putative enoyl-CoA isomerase                                                        | -    | 0.02 | 0.11 |
|               | 00362 Benzoate degradation                      | RER_39530 | putative enoyl-CoA hydratase                                                        | -    | -    | 0.09 |
|               | 00627 Aminobenzoate degradation                 | RER_39530 | putative enoyl-CoA hydratase                                                        | -    | -    | 0.09 |
|               | 00930 Caprolactam degradation                   | RER_39530 | putative enoyl-CoA hydratase                                                        | -    | -    | 0.09 |
|               | 00623 Toluene degradation                       | RER_20440 | putative succinate dehydrogenase hydrophobic membrane anchor protein (sdhD)         | 0.05 | -    | 0.06 |
|               | 00625 Chloroalkane and chloroalkene degradation | RER_18100 | aldehyde dehydrogenase                                                              | -    | -    | 0.05 |
|               | 00362 Benzoate degradation                      | RER_23640 | putative enoyl-CoA hydratase                                                        | 0.09 | -    | 0.04 |
|               | 00627 Aminobenzoate degradation                 | RER_23640 | putative enoyl-CoA hydratase                                                        | 0.09 | -    | 0.04 |
|               | 00930 Caprolactam degradation                   | RER_23640 | putative enoyl-CoA hydratase                                                        | 0.09 | -    | 0.04 |
|               | 00362 Benzoate degradation                      | RER_06160 | putative enoyl-CoA isomerase                                                        | -    | 0.02 | -    |
|               | 00627 Aminobenzoate degradation                 | RER_06160 | putative enoyl-CoA isomerase                                                        | -    | 0.02 | -    |
|               | 00930 Caprolactam degradation                   | RER_06160 | putative enoyl-CoA isomerase                                                        | -    | 0.02 | -    |
|               | 00984 Steroid degradation                       | RER_07540 | probable 3-ketosteroid 9alpha-hydroxylase component KshA, terminal oxygenase (kshA) | -    | 1.57 | -    |
|               | 00362 Benzoate degradation                      | RER_12070 | acetyl-CoA acetyltransferase, acetoacetyl-CoA thiolase                              | -    | 0.04 | -    |
|               | 00362 Benzoate degradation                      | RER_38940 | acetyl-CoA acetyltransferase, acetoacetyl-CoA thiolase                              | -    | 0.04 | -    |
|               | 00362 Benzoate degradation                      | RER_50070 | putative 3-hydroxybutyryl-CoA dehydrogenase (hbd)                                   | -    | 0.23 | -    |
|               | 00362 Benzoate degradation                      | RER_56680 | putative 3-hydroxybutyryl-CoA dehydrogenase (hbd)                                   | -    | 0.38 | -    |
|               | 00627 Aminobenzoate degradation                 | RER_57110 | putative amidase                                                                    | -    | 0.07 | -    |
|               | 00643 Styrene degradation                       | RER_57110 | putative amidase                                                                    | -    | 0.07 | -    |
| Transcription | 03020 RNA polymerase                            | RER_17340 | DNA-directed RNA polymerase beta' chain (rpoC)                                      | 0.13 | 0.18 | 0.68 |
|               | 03020 RNA polymerase                            | RER_17330 | DNA-directed RNA polymerase beta chain (rpoB)                                       | -    | 0.37 | 0.18 |
|               | 03020 RNA polymerase                            | RER_18810 | DNA-directed RNA polymerase alpha chain (rpoA)                                      | 0.1  | -    | 0.09 |
| Translation   | 03010 Ribosome                                  | RER_18640 | 50S ribosomal protein L5 (rplE)                                                     | 0.79 | 1.23 | 1.73 |
|               | 03010 Ribosome                                  | RER_18520 | 50S ribosomal protein L3 (rplC)                                                     | 1.77 | 1.48 | 1.54 |

|                |           |                                           |      |      |      |
|----------------|-----------|-------------------------------------------|------|------|------|
| 03010 Ribosome | RER_18670 | 30S ribosomal protein S8 (rpsH)           | 1.61 | 1.41 | 1.44 |
| 03010 Ribosome | RER_18790 | 30S ribosomal protein S11 (rpsK)          | 1.51 | 0.7  | 1.31 |
| 03010 Ribosome | RER_18700 | 30S ribosomal protein S5 (rpsE)           | 0.72 | 0.54 | 1.18 |
| 03010 Ribosome | RER_18680 | 50S ribosomal protein L6 (rplF)           | -    | 0.29 | 1.17 |
| 03010 Ribosome | RER_18550 | ribosomal protein L2 (rplB)               | 1.63 | 1.07 | 1.17 |
| 03010 Ribosome | RER_18800 | 30S ribosomal protein S4 (rpsD)           | 0.15 | 0.35 | 1.06 |
| 03010 Ribosome | RER_58280 | 50S ribosomal protein L9 (rplI)           | 0.7  | 0.85 | 1    |
| 03010 Ribosome | RER_18530 | 50S ribosomal protein L4 (rplD)           | 0.39 | 0.27 | 0.97 |
| 03010 Ribosome | RER_18720 | 50S ribosomal protein L15 (rplO)          | 0.24 | 0.39 | 0.95 |
| 03010 Ribosome | RER_18630 | 50S ribosomal protein L24 (rplX)          | 0.36 | 0.7  | 0.84 |
| 03010 Ribosome | RER_17180 | 50S ribosomal protein L1 (rplA)           | 1.3  | 0.34 | 0.79 |
| 03010 Ribosome | RER_17620 | 30S ribosomal protein S7 (rpsG)           | 1.21 | 1.09 | 0.78 |
| 03010 Ribosome | RER_25420 | 30S ribosomal protein S2 (rpsB)           | 0.46 | 0.16 | 0.68 |
| 03010 Ribosome | RER_24570 | 50S ribosomal protein L19 (rplS)          | 0.11 | 0.28 | 0.64 |
| 03010 Ribosome | RER_19050 | 30S ribosomal protein S9 (rpsI)           | 0.82 | 0.16 | 0.55 |
| 03010 Ribosome | RER_33120 | probable 30S ribosomal protein S1 (rpsA)  | 0.19 | 0.37 | 0.53 |
| 03010 Ribosome | RER_17170 | 50S ribosomal protein L11 (rplK)          | 0.67 | 0.43 | 0.5  |
| 03010 Ribosome | RER_18620 | 50S ribosomal protein L14 (rplN)          | 0.41 | 0.36 | 0.48 |
| 03010 Ribosome | RER_18590 | 50S ribosomal protein L16 (rplP)          | 0.1  | 0.12 | 0.47 |
| 03010 Ribosome | RER_17200 | 50S ribosomal protein L10 (rplJ)          | 1.14 | 0.12 | 0.46 |
| 03010 Ribosome | RER_18570 | 50S ribosomal protein L22 (rplV)          | 0.31 | 0.06 | 0.45 |
| 03010 Ribosome | RER_26430 | 30S ribosomal protein S15 (rpsO)          | 0.24 | -    | 0.43 |
| 03010 Ribosome | RER_18580 | 30S ribosomal protein S3 (rpsC)           | 0.13 | 0.3  | 0.42 |
| 03010 Ribosome | RER_19040 | 50S ribosomal protein L13 (rplM)          | 0.38 | -    | 0.4  |
| 03010 Ribosome | RER_18540 | 50S ribosomal protein L23 (rplW)          | -    | 0.06 | 0.36 |
| 03010 Ribosome | RER_24440 | probable 30S ribosomal protein S16 (rpsP) | 0.09 | 0.07 | 0.33 |
| 03010 Ribosome | RER_17610 | 30S ribosomal protein S12 (rpsL)          | 0.14 | 0.13 | 0.23 |
| 03010 Ribosome | RER_18780 | 30S ribosomal protein S13 (rpsM)          | 0.06 | 0.04 | 0.2  |
| 03010 Ribosome | RER_37930 | 50S ribosomal protein L27 (rpmA)          | 0.54 | 0.11 | 0.2  |
| 03010 Ribosome | RER_18820 | 50S ribosomal protein L17 (rplQ)          | 0.27 | 0.17 | 0.19 |
| 03010 Ribosome | RER_18690 | 50S ribosomal protein L18 (rplR)          | 0.11 | 0.05 | 0.16 |

|                                  |                                                   |           |                                                                                                                         |      |      |       |
|----------------------------------|---------------------------------------------------|-----------|-------------------------------------------------------------------------------------------------------------------------|------|------|-------|
|                                  | 03010 Ribosome                                    | RER_43250 | probable 50S ribosomal protein L25 (rplY)                                                                               | -    | -    | 0.15  |
|                                  | 03010 Ribosome                                    | RER_32940 | 50S ribosomal protein L35 (rpmI)                                                                                        | 0.27 | 0.05 | 0.14  |
|                                  | 03010 Ribosome                                    | RER_37670 | 30S ribosomal protein S20 (rpsT)                                                                                        | 0.04 | -    | 0.11  |
|                                  | 03010 Ribosome                                    | RER_17210 | 50S ribosomal protein L7/L12 (rplL)                                                                                     | 0.07 | 0.05 | 0.11  |
|                                  | 03010 Ribosome                                    | RER_18610 | 30S ribosomal protein S17 (rpsQ)                                                                                        | 0.04 | 0.09 | 0.11  |
|                                  | 03010 Ribosome                                    | RER_44060 | 30S ribosomal protein S18 (rpsR)                                                                                        | 0.03 | -    | 0.08  |
|                                  | 03010 Ribosome                                    | RER_37940 | 50S ribosomal protein L21 (rplU)                                                                                        | -    | 0.16 | 0.07  |
|                                  | 03010 Ribosome                                    | RER_18510 | 30S ribosomal protein S10 (rpsJ)                                                                                        | 0.15 | 0.09 | 0.07  |
|                                  | 03010 Ribosome                                    | RER_39180 | 50S ribosomal protein L31 (rpmE)                                                                                        | 0.06 | 0.05 | 0.06  |
|                                  | 03010 Ribosome                                    | RER_18560 | 30S ribosomal protein S19 (rpsS)                                                                                        | -    | 0.21 | 0.05  |
|                                  | 03010 Ribosome                                    | RER_58290 | probable 30S ribosomal protein S18 (rpsR)                                                                               | -    | -    | 0.05  |
|                                  | 03010 Ribosome                                    | RER_24220 | probable 50S ribosomal protein L28 (rpmB)                                                                               | 0.2  | -    | 0.04  |
|                                  | 03010 Ribosome                                    | RER_58310 | 30S ribosomal protein S6 (rpsF)                                                                                         | -    | -    | 0.02  |
|                                  | 03010 Ribosome                                    | RER_18650 | 30S ribosomal protein S14 type Z (rpsZ, rpsN)                                                                           | -    | 0.03 | -     |
|                                  | 00970 Aminoacyl-tRNA biosynthesis                 | RER_29030 | threonyl-tRNA synthetase, ThrRS, threonine--tRNA ligase (thrS)                                                          | -    | 0.05 | -     |
| Folding, sorting and degradation | 03018 RNA degradation                             | RER_15260 | 60 kDa chaperonin, GroEL protein (groEL2)                                                                               | 4.93 | 6.06 | 13.53 |
|                                  | 03018 RNA degradation                             | RER_13510 | chaperone protein DnaK, Hsp70 (dnaK)                                                                                    | 3.07 | 2.12 | 2.96  |
|                                  | 03018 RNA degradation                             | RER_19240 | 60 kDa chaperonin, GroEL protein (groEL1)                                                                               | 0.3  | 1.02 | 1.9   |
|                                  | 04141 Protein processing in endoplasmic reticulum | RER_50170 | chaperone protein HtpG (htpG)                                                                                           | 0.36 | 0.18 | 1.45  |
|                                  | 03018 RNA degradation                             | RER_42830 | enolase, phosphopyruvate hydratase (eno)                                                                                | 0.3  | 0.08 | 0.42  |
|                                  | 04141 Protein processing in endoplasmic reticulum | RER_12450 | putative heat shock protein Hsp18 (hsp18)                                                                               | -    | -    | 0.37  |
|                                  | 03060 Protein export                              | RER_24420 | signal recognition particle protein (ffh)                                                                               | -    | -    | 0.14  |
|                                  | 03018 RNA degradation                             | RER_26440 | guanosine pentaphosphate synthetase/polynucleotide phosphorylase, polyribonucleotide nucleotidyltransferase (gpsI, pnp) | 0.05 | 0.34 | 0.12  |
|                                  | 03018 RNA degradation                             | RER_40940 | probable ATP-dependent RNA helicase DeaD, DEAD-box protein (deaD)                                                       | -    | -    | 0.11  |
|                                  | 03060 Protein export                              | RER_29260 | putative protein-export membrane protein YajC (yajC)                                                                    | -    | 0.04 | 0.05  |
|                                  | 03060 Protein export                              | RER_29260 | putative protein-export membrane protein YajC (yajC)                                                                    | -    | 0.04 | -     |
|                                  | 04122 Sulfur relay system                         | RER_48100 | putative thiosulfate sulfurtransferase, rhodanese                                                                       | -    | 0.15 | -     |
|                                  | 03030 DNA replication                             | RER_35310 | DNA polymerase III alpha subunit (dnaE)                                                                                 | -    | -    | 0.43  |

|                          |                                       |           |                                                                                   |      |      |      |
|--------------------------|---------------------------------------|-----------|-----------------------------------------------------------------------------------|------|------|------|
| Replication and repair   | 03430 Mismatch repair                 | RER_35310 | DNA polymerase III alpha subunit (dnaE)                                           | -    | -    | 0.43 |
|                          | 03440 Homologous recombination        | RER_35310 | DNA polymerase III alpha subunit (dnaE)                                           | -    | -    | 0.43 |
|                          | 03030 DNA replication                 | RER_58300 | single-stranded DNA-binding protein (ssb)                                         | 0.28 | 0.09 | 0.12 |
|                          | 03430 Mismatch repair                 | RER_58300 | single-stranded DNA-binding protein (ssb)                                         | 0.28 | 0.09 | 0.12 |
|                          | 03440 Homologous recombination        | RER_58300 | single-stranded DNA-binding protein (ssb)                                         | 0.28 | 0.09 | 0.12 |
|                          | 03440 Homologous recombination        | RER_27530 | RecA protein, recombinase A (recA)                                                | -    | 0.04 | 0.05 |
|                          | 03440 Homologous recombination        | RER_27530 | RecA protein, recombinase A (recA)                                                | -    | 0.04 | -    |
| Membrane transport       | 02010 ABC transporters                | RER_27570 | glutamate ABC transporter glutamate-binding protein (gluB)                        | 0.69 | 0.27 | 0.53 |
|                          | 03070 Bacterial secretion system      | RER_24420 | signal recognition particle protein (ffh)                                         | -    | -    | 0.14 |
|                          | 02060 Phosphotransferase system (PTS) | RER_39610 | phosphotransferase system enzyme IIC component, PTS sugar-specific EIIC component | -    | 0.13 | 0.13 |
|                          | 03070 Bacterial secretion system      | RER_29260 | putative protein-export membrane protein YajC (yajC)                              | -    | 0.04 | 0.05 |
|                          | 03070 Bacterial secretion system      | RER_29260 | putative protein-export membrane protein YajC (yajC)                              | -    | 0.04 | -    |
|                          | 02060 Phosphotransferase system (PTS) | RER_39610 | phosphotransferase system enzyme IIC component, PTS sugar-specific EIIC component | -    | 0.13 | -    |
|                          | 02060 Phosphotransferase system (PTS) | RER_39630 | phosphotransferase system enzyme IIA component, PTS sugar-specific EIIC component | -    | 0.1  | -    |
|                          | 02010 ABC transporters                | RER_10320 | putative ABC transporter substrate-binding protein                                | 0.06 | -    | -    |
| Signal transduction      | 04066 HIF-1 signaling pathway         | RER_30290 | glyceraldehyde-3-phosphate dehydrogenase (gap)                                    | 2.22 | 1.42 | 2.25 |
|                          | 04151 PI3K-Akt signaling pathway      | RER_50170 | chaperone protein HtpG (htpG)                                                     | 0.36 | 0.18 | 1.45 |
|                          | 04066 HIF-1 signaling pathway         | RER_42830 | enolase, phosphopyruvate hydratase (eno)                                          | 0.3  | 0.08 | 0.42 |
|                          | 02020 Two-component system            | RER_42680 | putative beta-ketoacyl-CoA thiolase                                               | -    | 0.48 | 0.2  |
|                          | 02020 Two-component system            | RER_36230 | glutamine synthetase I, glutamate--ammonia ligase (glnA, glnA1)                   | -    | -    | 0.11 |
|                          | 04066 HIF-1 signaling pathway         | RER_59850 | branched-chain alpha-keto acid dehydrogenase E1 beta subunit                      | -    | -    | 0.08 |
|                          | 02020 Two-component system            | RER_12070 | acetyl-CoA acetyltransferase, acetoacetyl-CoA thiolase                            | -    | 0.04 | -    |
|                          | 02020 Two-component system            | RER_38940 | acetyl-CoA acetyltransferase, acetoacetyl-CoA thiolase                            | -    | 0.04 | -    |
| Transport and catabolism | 04151 PI3K-Akt signaling pathway      | RER_10900 | GTP-dependent phosphoenolpyruvate carboxykinase (pckG)                            | 0.03 | -    | -    |
|                          | 04146 Peroxisome                      | RER_20050 | NADP-dependent isocitrate dehydrogenase (icd)                                     | 0.13 | 0.8  | 0.56 |
|                          | 04146 Peroxisome                      | RER_14950 | probable superoxide dismutase, Cu/Zn-SOD (sodC)                                   | 0.81 | 0.28 | 0.45 |
|                          | 04146 Peroxisome                      | RER_40330 | probable long-chain fatty-acid--CoA ligase, acyl-CoA synthetase (fadD)            | -    | 0.21 | -    |

|                       |                                |                 |                                                                                   |       |      |      |
|-----------------------|--------------------------------|-----------------|-----------------------------------------------------------------------------------|-------|------|------|
| Cell growth and death | 04112 Cell cycle - Caulobacter | RER_38150       | ATP-dependent Clp protease proteolytic subunit ClpP, endopeptidase Clp (clpP)     | -     | 0.16 | 0.13 |
|                       | 04112 Cell cycle - Caulobacter | RER_35490       | cell division protein FtsZ, GTPase (ftsZ)                                         | -     | -    | 0.08 |
|                       | 04112 Cell cycle - Caulobacter | RER_38140       | ATP-dependent Clp protease proteolytic subunit ClpP, endopeptidase Clp (clpP)     | -     | 0.04 | -    |
| Unclassified          |                                | RER_19230       | 10 kDa chaperonin, GroES protein (groES)                                          | 0.81  | 0.39 | 1.89 |
|                       |                                | RER_09370       | putative oxidoreductase                                                           | 1.84  | 2.07 | 1.76 |
|                       |                                | RER_pREL1-02570 | putative zinc-containing alcohol dehydrogenase                                    | 1.69  | 0.91 | 1.46 |
|                       |                                | RER_04970       | putative ABC transporter substrate-binding protein                                | 0.44  | -    | 1.4  |
|                       |                                | RER_24100       | putative DNA-binding protein HU, histone-like protein (hup)                       | 2.87  | 0.17 | 1    |
|                       |                                | RER_25430       | elongation factor Ts, EF-Ts (tsf)                                                 | 0.02  | 0.23 | 0.98 |
|                       |                                | RER_55180       | putative AraC family transcriptional regulator                                    | 0.4   | 0.7  | 0.97 |
|                       |                                | RER_07700       | hypothetical protein                                                              | 0.08  | -    | 0.89 |
|                       |                                | RER_02160       | mycolyltransferase                                                                | 13.96 | 2.3  | 0.87 |
|                       |                                | RER_pREL1-02550 | conserved hypothetical protein                                                    | 1.19  | 1.19 | 0.84 |
|                       |                                | RER_04800       | CRP/FNR family transcriptional regulator                                          | 1.04  | 0.53 | 0.61 |
|                       |                                | RER_pREC1-00490 | conserved hypothetical protein                                                    | 4.6   | 0.5  | 0.56 |
|                       |                                | RER_35390       | hypothetical protein                                                              | 0.15  | 0.34 | 0.44 |
|                       |                                | RER_27870       | alkyl hydroperoxide reductase AhpC, alkyl hydroperoxidase C, peroxiredoxin (ahpC) | 0.28  | 0.68 | 0.43 |
|                       |                                | RER_05950       | putative tellurium resistance protein                                             | 0.2   | 0.06 | 0.41 |
|                       |                                | RER_01360       | putative 3-hydroxyacyl-CoA dehydrogenase                                          | 0.23  | 0.18 | 0.39 |
|                       |                                | RER_41220       | 2-oxoglutarate dehydrogenase E1 component (sucA, odhA)                            | -     | 0.05 | 0.37 |
|                       |                                | RER_41730       | aromatic amino acid transport protein (aroP)                                      | 0.25  | 1.59 | 0.37 |
|                       |                                | RER_17630       | elongation factor G, EF-G (fusA)                                                  | 0.06  | 0.35 | 0.35 |
|                       |                                | RER_pREL1-02600 | cytochrome P450                                                                   | 0.31  | 0.36 | 0.35 |
|                       |                                | RER_41180       | conserved hypothetical protein                                                    | -     | -    | 0.35 |
|                       |                                | RER_pREL1-01540 | phosphate ABC transporter phosphate-binding protein (pstS)                        | 0.45  | -    | 0.34 |
|                       |                                | RER_pREL1-02830 | cytochrome P450                                                                   | 0.06  | 1.03 | 0.29 |
|                       |                                | RER_06850       | hypothetical protein                                                              | 0.49  | 0.38 | 0.27 |
|                       |                                | RER_11630       | hypothetical protein                                                              | 0.04  | -    | 0.24 |
|                       |                                | RER_00210       | putative CdaR family transcriptional regulator                                    | -     | -    | 0.23 |

|                 |                                                                     |      |      |      |
|-----------------|---------------------------------------------------------------------|------|------|------|
| RER_42290       | hypothetical protein                                                | 0.11 | -    | 0.2  |
| RER_36350       | mycolyltransferase                                                  | 3.3  | 0.91 | 0.2  |
| RER_54170       | probable mycolyltransferase                                         | 2.96 | 0.74 | 0.2  |
| RER_30750       | enoyl-[acyl-carrier-protein] reductase (fabI)                       | -    | -    | 0.19 |
| RER_23310       | conserved hypothetical protein                                      | 0.08 | 0.2  | 0.19 |
| RER_26320       | translation initiation factor IF-2 (infB)                           | -    | 0.03 | 0.17 |
| RER_47220       | putative ATP-dependent Clp protease ATP-binding subunit ClpC (clpC) | -    | -    | 0.16 |
| RER_46820       | hypothetical protein                                                | -    | -    | 0.16 |
| RER_35440       | conserved hypothetical protein                                      | -    | -    | 0.14 |
| RER_36210       | conserved hypothetical protein                                      | 0.21 | -    | 0.13 |
| RER_52420       | putative acyl-CoA dehydrogenase                                     | -    | -    | 0.13 |
| RER_47410       | putative organic hydroperoxide resistance protein (ohr)             | -    | -    | 0.12 |
| RER_01740       | putative ferritin (ftn)                                             | -    | -    | 0.12 |
| RER_44690       | conserved hypothetical protein                                      | 0.19 | 0.09 | 0.12 |
| RER_pREL1-02560 | fatty-acid--CoA ligase, acyl-CoA synthetase (fadD)                  | 0.69 | -    | 0.12 |
| RER_34140       | putative membrane protein                                           | -    | -    | 0.12 |
| RER_00120       | conserved hypothetical protein                                      | 0.4  | -    | 0.11 |
| RER_06460       | putative ATP-dependent Clp protease ATP-binding subunit ClpC (clpC) | 0.31 | 0.05 | 0.1  |
| RER_38330       | putative ABC transporter ATP-binding protein                        | -    | -    | 0.1  |
| RER_41420       | putative two-component histidine kinase                             | -    | 0.35 | 0.1  |
| RER_41620       | putative methyltransferase                                          | -    | 0.13 | 0.1  |
| RER_pREC1-00400 | conserved hypothetical protein                                      | -    | -    | 0.09 |
| RER_31950       | hypothetical protein                                                | -    | -    | 0.09 |
| RER_29220       | conserved hypothetical protein                                      | 0.39 | 0.11 | 0.08 |
| RER_03650       | putative LysR family transcriptional regulator                      | -    | -    | 0.08 |
| RER_29970       | elongation factor P, EF-P (efp)                                     | 0.08 | -    | 0.07 |
| RER_38160       | trigger factor (tig)                                                | -    | 0.06 | 0.07 |
| RER_18370       | putative non-ribosomal peptide synthetase                           | -    | -    | 0.07 |
| RER_pREL1-02750 | putative acyltransferase                                            | -    | -    | 0.07 |

|                 |                                                             |      |      |      |
|-----------------|-------------------------------------------------------------|------|------|------|
| RER_18890       | probable S8 family peptidase                                | -    | -    | 0.07 |
| RER_21790       | acyl-CoA desaturase, steroyl-CoA delta(9)-desaturase        | -    | -    | 0.07 |
| RER_41920       | probable GTP-binding protein TypA (typA, bipA)              | -    | -    | 0.07 |
| RER_42610       | transcription elongation factor GreA (greA)                 | -    | -    | 0.06 |
| RER_41130       | putative drug resistance efflux protein                     | -    | -    | 0.06 |
| RER_49020       | putative TetR family transcriptional regulator              | -    | -    | 0.06 |
| RER_15890       | putative heparin-binding hemagglutinin                      | -    | 0.16 | 0.05 |
| RER_12710       | probable cold shock protein                                 | 0.11 | -    | 0.05 |
| RER_00330       | conserved hypothetical protein                              | -    | -    | 0.05 |
| RER_05110       | probable cold shock protein                                 | 0.03 | -    | 0.05 |
| RER_35260       | putative TetR family transcriptional regulator              | -    | -    | 0.05 |
| RER_38530       | putative TetR family transcriptional regulator              | -    | -    | 0.05 |
| RER_13720       | conserved hypothetical protein                              | -    | -    | 0.04 |
| RER_40770       | putative acyl-CoA carboxylase                               | -    | -    | 0.04 |
| RER_31380       | conserved hypothetical protein                              | 0.05 | 1.1  | 0.04 |
| RER_pREC1-00050 | hypothetical protein                                        | -    | -    | 0.04 |
| RER_28540       | probable peptide methionine sulfoxide reductase MsrB (msrB) | -    | -    | 0.03 |
| RER_pREL1-01680 | conserved hypothetical protein                              | -    | -    | 0.03 |
| RER_37780       | conserved hypothetical protein                              | -    | -    | 0.02 |
| RER_pREC1-00500 | conserved hypothetical protein                              | 2.08 | -    | 0.01 |
| RER_02750       | putative membrane protein                                   | 0.92 | 0.06 | -    |
| RER_04680       | conserved hypothetical protein                              | 0.06 | 0.09 | -    |
| RER_13390       | putative S1 family peptidase                                | 0.07 | 0.05 | -    |
| RER_27420       | conserved hypothetical protein                              | 0.21 | 0.13 | -    |
| RER_36730       | acyl carrier protein (acpM, acpP)                           | 0.03 | 0.05 | -    |
| RER_37100       | putative Fur family transcriptional regulator               | 0.5  | 0.15 | -    |
| RER_42380       | conserved hypothetical protein                              | 0.16 | 0.04 | -    |
| RER_48260       | conserved hypothetical protein                              | 2.39 | 0.24 | -    |
| RER_00100       | DNA gyrase subunit A (gyrA)                                 | -    | 0.09 | -    |
| RER_00170       | peptidyl-prolyl cis-trans isomerase                         | -    | 0.19 | -    |
| RER_00570       | hypothetical protein                                        | -    | 0.06 | -    |

|           |                                                                            |   |      |   |
|-----------|----------------------------------------------------------------------------|---|------|---|
| RER_02660 | putative membrane protein                                                  | - | 0.23 | - |
| RER_02720 | hypothetical protein                                                       | - | 0.05 | - |
| RER_02790 | hypothetical protein                                                       | - | 0.03 | - |
| RER_04530 | putative oxidoreductase                                                    | - | 2.95 | - |
| RER_06040 | putative tellurium resistance protein                                      | - | 0.09 | - |
| RER_06640 | conserved hypothetical protein                                             | - | 0.04 | - |
| RER_07490 | rubredoxin reductase (rubB)                                                | - | 1.02 | - |
| RER_08230 | putative ABC transporter substrate-binding protein                         | - | 0.14 | - |
| RER_09220 | conserved hypothetical protein                                             | - | 0.11 | - |
| RER_10650 | conserved hypothetical protein                                             | - | 0.52 | - |
| RER_12570 | hypothetical protein                                                       | - | 1.07 | - |
| RER_15250 | hypothetical protein                                                       | - | 0.32 | - |
| RER_15910 | putative hydrolase                                                         | - | 0.04 | - |
| RER_16250 | hypothetical membrane protein                                              | - | 1.15 | - |
| RER_16590 | putative ABC transporter substrate-binding protein                         | - | 0.4  | - |
| RER_16920 | hypothetical protein                                                       | - | 1.82 | - |
| RER_17600 | conserved hypothetical protein                                             | - | 1.12 | - |
| RER_19720 | putative oxidoreductase                                                    | - | 0.82 | - |
| RER_20960 | conserved hypothetical protein                                             | - | 0.96 | - |
| RER_21720 | conserved hypothetical protein                                             | - | 0.05 | - |
| RER_21780 | NADPH oxidoreductase                                                       | - | 0.03 | - |
| RER_23390 | molybdenum cofactor biosynthesis bifunctional protein MoaCB (moaCB)        | - | 0.01 | - |
| RER_23650 | putative methyltransferase                                                 | - | 0.33 | - |
| RER_27050 | putative MFS transporter                                                   | - | 0.19 | - |
| RER_27300 | hypothetical protein                                                       | - | 0.03 | - |
| RER_27680 | conserved hypothetical membrane protein                                    | - | 0.66 | - |
| RER_30420 | putative OxPP cycle protein OpcA (opcA)                                    | - | 2    | - |
| RER_30570 | putative iron-sulfur cluster assembly protein SufC, ABC-type ATPase (sufC) | - | 0.04 | - |
| RER_32120 | conserved hypothetical protein                                             | - | 0.04 | - |



|                 |                                                                                          |      |      |   |
|-----------------|------------------------------------------------------------------------------------------|------|------|---|
| RER_33060       | conserved hypothetical protein                                                           | -    | 0.08 | - |
| RER_36740       | 3-oxoacyl-[acyl-carrier-protein] synthase II, beta-ketoacyl-ACP synthase II (fabF, kasA) | -    | 0.08 | - |
| RER_37400       | chaperone protein DnaJ (dnaJ)                                                            | -    | 0.23 | - |
| RER_38160       | trigger factor (tig)                                                                     | -    | 0.06 | - |
| RER_38240       | conserved hypothetical protein                                                           | -    | 0.03 | - |
| RER_38250       | conserved hypothetical protein                                                           | -    | 0.15 | - |
| RER_41220       | 2-oxoglutarate dehydrogenase E1 component (sucA, odhA)                                   | -    | 0.05 | - |
| RER_41410       | conserved hypothetical protein                                                           | -    | 0.05 | - |
| RER_42070       | conserved hypothetical protein                                                           | -    | 0.36 | - |
| RER_44660       | probable NarL family two-component response regulator                                    | -    | 0.08 | - |
| RER_45980       | hypothetical protein                                                                     | -    | 0.07 | - |
| RER_46110       | FKBP-type peptidyl-prolyl cis-trans isomerase                                            | -    | 0.02 | - |
| RER_46390       | probable resuscitation-promoting factor (rpf)                                            | -    | 0.06 | - |
| RER_49470       | putative ABC transporter ATP-binding protein                                             | -    | 0.07 | - |
| RER_50370       | putative ABC transporter permease protein                                                | -    | 0.13 | - |
| RER_52580       | acyl-CoA dehydrogenase (fadE)                                                            | -    | 0.14 | - |
| RER_54770       | putative ArsR family transcriptional regulator                                           | -    | 0.48 | - |
| RER_55960       | putative oxidoreductase                                                                  | -    | 0.01 | - |
| RER_56230       | putative 3-hydroxyacyl-CoA dehydrogenase                                                 | -    | 0.05 | - |
| RER_56880       | putative hydrolase                                                                       | -    | 1.87 | - |
| RER_57630       | putative MerR family transcriptional regulator                                           | -    | 0.25 | - |
| RER_59430       | putative acid--CoA ligase                                                                | -    | 0.08 | - |
| RER_59700       | hypothetical protein                                                                     | -    | 0.13 | - |
| RER_pREC1-00280 | conserved hypothetical protein                                                           | -    | 0.16 | - |
| RER_pREC1-00750 | transposase (tnpA)                                                                       | -    | 0.12 | - |
| RER_pREL1-00940 | conserved hypothetical protein                                                           |      | 0.45 | - |
| RER_00620       | putative CPA1 family transporter                                                         | 0.53 | -    | - |
| RER_01310       | conserved hypothetical protein                                                           | 0.43 | -    | - |
| RER_01800       | conserved hypothetical membrane protein                                                  | 0.12 | -    | - |
| RER_02170       | mycolyltransferase (csp1)                                                                | 1.4  | -    | - |

|                 |                                                                        |      |   |   |
|-----------------|------------------------------------------------------------------------|------|---|---|
| RER_02210       | probable polyketide synthase Pks13, type I polyketide synthase (pks13) | 0.03 | - | - |
| RER_08480       | putative iron-containing alcohol dehydrogenase                         | 0.08 | - | - |
| RER_11110       | conserved hypothetical protein                                         | 0.14 | - | - |
| RER_13910       | chaperone ClpB (clpB)                                                  | 0.17 | - | - |
| RER_15370       | putative mycolyltransferase                                            | 0.26 | - | - |
| RER_15970       | hypothetical protein                                                   | 0.09 | - | - |
| RER_17110       | conserved hypothetical protein                                         | 0.32 | - | - |
| RER_18410       | putative mycolyltransferase                                            | 1.62 | - | - |
| RER_18760       | translation initiation factor IF-1 (infA)                              | 0.03 | - | - |
| RER_24560       | conserved hypothetical membrane protein                                | 0.75 | - | - |
| RER_26470       | hypothetical protein                                                   | 0.57 | - | - |
| RER_28200       | conserved hypothetical protein                                         | 0.07 | - | - |
| RER_29950       | hypothetical membrane protein                                          | 0.09 | - | - |
| RER_32010       | conserved hypothetical protein                                         | 0.18 | - | - |
| RER_33030       | hypothetical protein                                                   | 0.1  | - | - |
| RER_35890       | conserved hypothetical protein                                         | 0.02 | - | - |
| RER_37800       | putative oxidoreductase                                                | 0.05 | - | - |
| RER_38660       | conserved hypothetical protein                                         | 0.09 | - | - |
| RER_40130       | putative mannose-binding protein, lectin                               | 0.1  | - | - |
| RER_41960       | conserved hypothetical protein                                         | 0.24 | - | - |
| RER_44310       | conserved hypothetical protein                                         | 0.05 | - | - |
| RER_44680       | putative F420-dependent oxidoreductase                                 | 0.12 | - | - |
| RER_44710       | conserved hypothetical protein                                         | 0.06 | - | - |
| RER_45180       | conserved hypothetical protein                                         | 0.04 | - | - |
| RER_48960       | putative MFS transporter                                               | 0.18 | - | - |
| RER_55800       | putative fatty-acid--CoA ligase, acyl-CoA synthetase                   | 0.09 | - | - |
| RER_59030       | putative ABC transporter substrate-binding protein                     | 0.06 | - | - |
| RER_pREL1-01860 | putative lipase                                                        | 0.31 | - | - |
| RER_pREL1-02580 | aldehyde dehydrogenase                                                 | 0.02 | - | - |
| RER_pREL1-02590 | 2Fe-2S ferredoxin                                                      | 0.15 | - | - |

Shotgun proteomic analysis results of the samples resolved in the gel shown in Fig. S1A. The data indicate the relative percent of total protein detected by LC-MS/MS. Proteins under all conditions tested are categorized based on the KO IDs, and listed with reference in decreasing order of relative abundance of C19. A bar (-) means not detected.

### Supplemental figure legends

**Fig. S1.** Protein analysis. (A) SDS-PAGE analysis. “None” indicates total proteins extracted from *R. erythropolis* PR4 cells grown in IB medium, “C12” indicates total proteins extracted from PR4 cells grown in IB medium containing *n*-dodecane (C12), and “C19” indicates total proteins extracted from PR4 cells grown in IB medium containing pristane (C19). (B) GroEL2 expression by western blotting analysis of GroEL2 using anti-GroEL2 polyclonal antibody. Numbers indicate relative amounts of GroEL2 compared to the control condition (None), which was taken as 1.

**Fig. S2.** Localization of the PR4 (pK4- $\Delta$ EL2-1) strain in two phase cultures containing alkanes of various carbon chain length (upper series). Lower series shows phase-contrast micrographs of hydrocarbon droplets illustrating differences in bacterial localization. “AL” and “AQ” indicate the alkane phase and the aqueous supernatant phase, respectively. All photographs show the same magnification. Scale bar = 10  $\mu$ m.

Fig. S1.

5

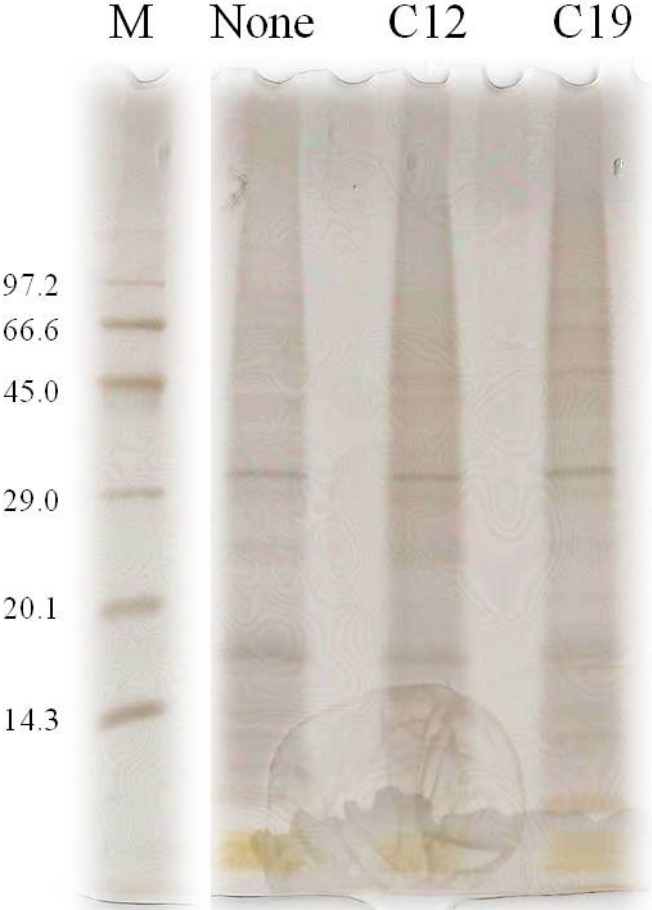

A. SDS-PAGE

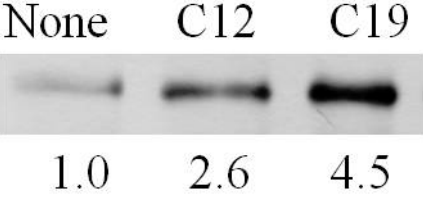

B. Expression of GroEL2 by western blotting

Fig. S2.

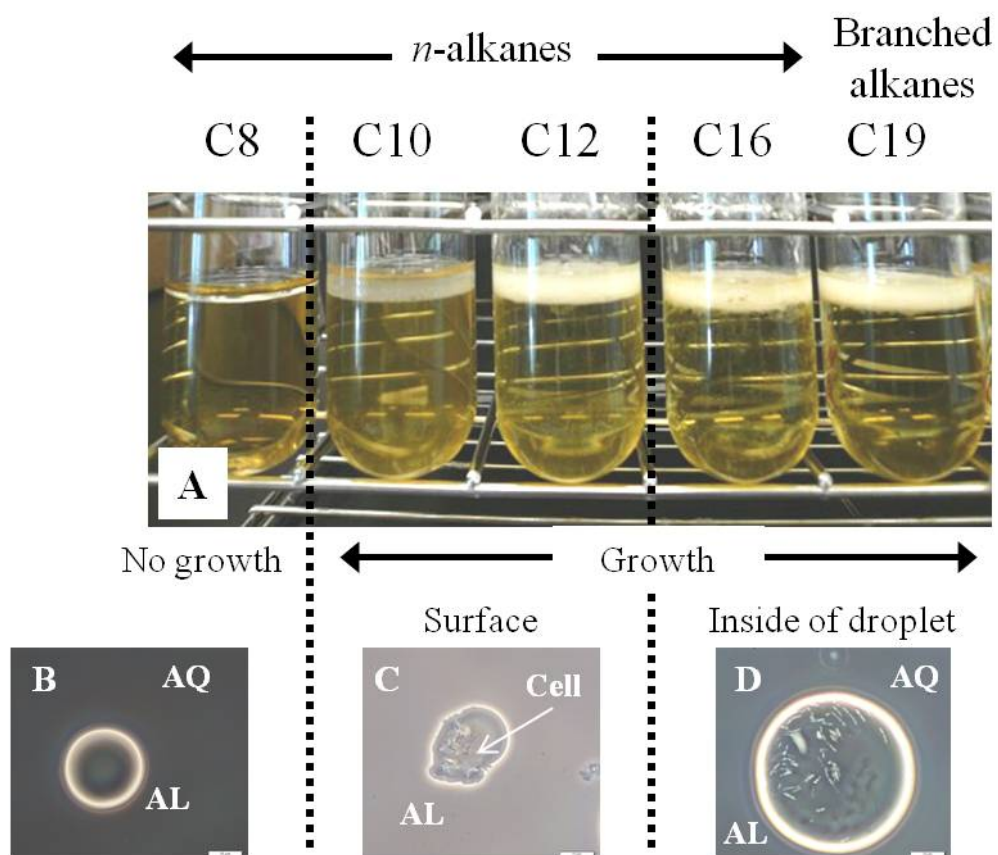

Supplement: 29_346_s1.pdf [file 29_346_s1.pdf]
